# Supplementary material for: Targeting Apoptosis Pathways With BCL2 and MDM2 Inhibitors in Adult B-cell Acute Lymphoblastic Leukemia
Source: PubMed Central journal article supplement — Hemasphere. 2022 Feb 24;6(3):e701. doi: 10.1097/HS9.0000000000000701 (PMC8878725; doi:10.1097/hs9.0000000000000701), 2022-02-24
Supplement: hs9-6-e701-s003.pdf [file hs9-6-e701-s003.pdf]

**Supplementary Table 1**

| Patient | Age | Diagnosis | Blast_percent | Archer_fusionplex1 | Archer_fusionplex2 | Archer_fusionplex3 |
|---------|-----|-----------|---------------|--------------------|--------------------|--------------------|
| Pt_1    | 68  | B ALL     | 90            | NA                 |                    |                    |
| Pt_2    | 67  | Ph+ ALL   | 60            | NA                 |                    |                    |
| Pt_3    | 44  | Ph+ ALL   | 98            | NA                 |                    |                    |
| Pt_4    | 43  | B ALL     | 95            | NA                 |                    |                    |
| Pt_5    | 35  | Ph+ ALL   | 90            | BCR-ABL1           |                    |                    |
| Pt_6    | 43  | B ALL     | 57            | ETV6-ABL1          |                    |                    |
| Pt_7    | 68  | Ph+ ALL   | 98            | BCR-ABL1           | IKZF1              |                    |
| Pt_8    | 40  | Ph+ ALL   | 80            | BCR-ABL1           |                    |                    |
| Pt_9    | 46  | Ph+ ALL   | 95            | NA                 |                    |                    |
| Pt_10   | 37  | B ALL     | 85            | NA                 |                    |                    |
| Pt_11   | 52  | Ph+ ALL   | 80            | BCR-ABL1           | IKZF1              | PAX-MLLT3          |
| Pt_12   | 32  | Ph+ ALL   | 90            | BCR-ABL1           | IKZF1              |                    |
| Pt_13   | 26  | B ALL     | 90            | NA                 |                    |                    |
| Pt_14   | 24  | B ALL     | 90            | NA                 |                    |                    |
| Pt_15   | 52  | B ALL     | 54            | NA                 |                    |                    |
| Pt_16   | 30  | Ph+ ALL   | 85            | BCR-ABL1           |                    |                    |
| Pt_17   | 60  | B ALL     | 85            | NA                 |                    |                    |
| Pt_18   | 22  | Ph+ ALL   | 89            | NA                 |                    |                    |

\*NA = analysis not available

**Supplementary Table 2**

| Compound           | Class                                      | C1(nM) | C2 (nM) | C3 (nM) | C4 (nM) | C5 (nM) |
|--------------------|--------------------------------------------|--------|---------|---------|---------|---------|
| Alisertib          | Aurora inhibitor                           | 1      | 10      | 100     | 1000    | 10000   |
| Axitinib           | VEGFR inhibitor                            | 1      | 10      | 100     | 1000    | 10000   |
| Belinostat         | HDAC inhibitor                             | 1      | 10      | 100     | 1000    | 10000   |
| BGB324             | Axl inhibitor                              | 1      | 10      | 100     | 1000    | 10000   |
| BMS_754807         | IGF1R inhibitor                            | 1      | 10      | 100     | 1000    | 10000   |
| Bosutinib          | BCR-ABL inhibitor                          | 1      | 10      | 100     | 1000    | 10000   |
| CEP-32496          | BRAF inhibitor                             | 1      | 10      | 100     | 1000    | 10000   |
| Cerdulatinib       | JAK, SYK inhibitor                         | 1      | 10      | 100     | 1000    | 10000   |
| Cobimetinib        | MEK1/2 inhibitor                           | 0,1    | 1       | 10      | 100     | 1000    |
| Danusertib         | Aurora, Ret, TrkA, FGFR-1 inhibitor        | 1      | 10      | 100     | 1000    | 10000   |
| Daporinad          | NAMPT inhibitor                            | 0,1    | 1       | 10      | 100     | 1000    |
| Dasatinib          | BCR-ABL inhibitor                          | 0,1    | 1       | 10      | 100     | 1000    |
| Dexamethasone      | glucocorticoid                             | 1      | 10      | 100     | 1000    | 10000   |
| Duvelisib          | PI3K delta, gamma inhibitor                | 0,05   | 0,5     | 5       | 50      | 500     |
| FRAX486            | PAK1, 2, 3 inhibitor                       | 0,5    | 5       | 50      | 500     | 500     |
| Gedatolisib        | PI3K/mTOR inhibitor                        | 0,1    | 1       | 10      | 100     | 1000    |
| Glasdegib          | SMO inhibitor                              | 0,1    | 1       | 10      | 100     | 1000    |
| GSK_2334470        | PDK1 inhibitor                             | 1      | 10      | 100     | 1000    | 10000   |
| GSK525762          | BET inhibitor                              | 1      | 10      | 100     | 1000    | 10000   |
| Idasanutlin        | MDM2 antagonist                            | 1      | 10      | 100     | 1000    | 10000   |
| Idelalisib         | PI3K inhibitor                             | 1      | 10      | 100     | 1000    | 10000   |
| Imatinib           | BCR-ABL inhibitor                          | 1      | 10      | 100     | 1000    | 10000   |
| JQ1                | BET inhibitor                              | 1      | 10      | 100     | 1000    | 10000   |
| Lenalidomide       | immunomodulatory                           | 10     | 100     | 1000    | 10000   | 100000  |
| Lestaurtinib       | FLT3, JAK2, TrkA,TrkB,TrkC inhibitor       | 0,1    | 1       | 10      | 100     | 1000    |
| LLL12              | STAT3 inhibitor                            | 1      | 10      | 100     | 1000    | 10000   |
| Losmapimod         | p38MAPK inhibitor                          | 1      | 10      | 100     | 1000    | 10000   |
| Luminespib         | HSP90 inhibitor                            | 0,1    | 1       | 10      | 100     | 1000    |
| LY3009120          | pan-RAF inhibitor                          | 1      | 10      | 100     | 1000    | 10000   |
| Mepacrine          | anti-malaria                               | 5      | 50      | 500     | 5000    | 50000   |
| Methylprednisolone | glucocorticoid                             | 1      | 10      | 100     | 1000    | 10000   |
| Milciclib          | CDK2 inhibitor                             | 1      | 10      | 100     | 1000    | 10000   |
| MK_2206            | Akt inhibitor                              | 0,1    | 1       | 10      | 100     | 1000    |
| MLN_0128           | mTOR inhibitor                             | 0,1    | 1       | 10      | 100     | 1000    |
| Navitoclax         | Bcl-2 and Bcl-xL inhibitor                 | 1      | 10      | 100     | 1000    | 10000   |
| Nilotinib          | BCR-ABL inhibitor                          | 1      | 10      | 100     | 1000    | 10000   |
| Nintedanib         | VEGFR inhibitor                            | 1      | 10      | 100     | 1000    | 10000   |
| NVP_ABL001         | selective allosteric inhibitor of BCR-ABL1 | 0,1    | 1       | 10      | 100     | 1000    |
| NVP_AEW541         | IGF1R inhibitor                            | 1      | 10      | 100     | 1000    | 10000   |
| NVP_LCL161         | IAPs, SMAC mimetic                         | 1      | 10      | 100     | 1000    | 10000   |
| Onalespib          | HSP90 inhibitor                            | 0,25   | 2,5     | 25      | 250     | 2500    |

|              |                                       |       |      |     |      |       |
|--------------|---------------------------------------|-------|------|-----|------|-------|
| Osimertinib  | EGFR(L858R/T790M) inhibitor           | 0,25  | 2,5  | 25  | 250  | 2500  |
| Pexidartinib | KIT, CSF1R, FLT3 inhibitor            | 1     | 10   | 100 | 1000 | 10000 |
| Pimozide     | STAT5 inhibitor                       | 0.01  | 0.01 | 1   | 10   | 100   |
| Plicamycin   | RNA synthesis inhibitor               | 1     | 10   | 100 | 1000 | 10000 |
| Pomalidomide | immunomodulatory                      | 1     | 10   | 100 | 1000 | 10000 |
| Ponatinib    | BCR-ABL inhibitor                     | 0,1   | 1    | 10  | 100  | 1000  |
| PRI_724      | CBP/beta-catenin antagonist           | 1     | 10   | 100 | 1000 | 10000 |
| Radotinib    | BCR-ABL inhibitor                     | 0.02  | 2    | 20  | 200  | 2000  |
| Ralimetinib  | p38MAPK inhibitor                     | 1     | 10   | 100 | 1000 | 10000 |
| Raloxifene   | Selective estrogen receptor modulator | 1     | 10   | 100 | 1000 | 10000 |
| Ruxolitinib  | JAK1&2 inhibitor                      | 1     | 10   | 100 | 1000 | 10000 |
| SAR405838    | MDM2 antagonist                       | 1     | 10   | 100 | 1000 | 10000 |
| Saracatinib  | Abl, Src inhibitor                    | 1     | 10   | 100 | 1000 | 10000 |
| SCH772984    | ERK1&2 inhibitor                      | 1     | 10   | 100 | 1000 | 10000 |
| STAT5i       | STAT5 inhibitor                       | 0.05  | 0.05 | 5   | 50   | 500   |
| Sunitinib    | Broad TK inhibitor                    | 0,1   | 1    | 10  | 100  | 1000  |
| Temsirolimus | mTOR inhibitor                        | 0,01  | 0,1  | 1   | 10   | 100   |
| Tipifarnib   | Farnesyltransferase inhibitor         | 1     | 10   | 100 | 1000 | 10000 |
| Tivozanib    | VEGFR inhibitor                       | 1     | 10   | 100 | 1000 | 10000 |
| Trametinib   | MEK inhibitor                         | 0,025 | 0,25 | 2,5 | 25   | 250   |
| Ulixertinib  | ERK inhibitor                         | 1     | 10   | 100 | 1000 | 10000 |
| Venetoclax   | Selective Bcl-2 inhibitor             | 0,1   | 1    | 10  | 100  | 1000  |
| Vistusertib  | mTOR inhibitor                        | 1     | 10   | 100 | 1000 | 10000 |

### Supplementary Table 3

#### Combinations

- 1 Dasatinib + Venetoclax
- 2 Dasatinib + Navitoclax
- 3 Dasatinib + Idasanutlin
- 4 Idasanutlin + Venetoclax
- 5 Idasanutlin + Navitoclax

| Drug        | C1 | C2  | C3 | C4 | max conc (nM) |      |
|-------------|----|-----|----|----|---------------|------|
| Dasatinib   |    | 0,1 | 1  | 10 | 100           | 1000 |
| Venetoclax  |    | 0,1 | 1  | 10 | 100           | 1000 |
| Navitoclax  |    | 0,1 | 1  | 10 | 100           | 1000 |
| Idasanutlin |    | 0,1 | 1  | 10 | 100           | 1000 |

**Supplementary Table 4**

Average RNA Sequencing Quality Metrics

|                            |       |
|----------------------------|-------|
| rRNA rate                  | <1.5% |
| Intergenic reads rate      | 4.96% |
| Mapped total reads         | 104M  |
| Duplication rate of mapped | 32 %  |

| Sample | End 2 Mapping Rate | Chimeric Pairs | Intragenic Rate | Num. Gaps | Exonic Rate | Mapping Rate | 5' Norm    | Genes Detected | Unique Rate of Mapped |
|--------|--------------------|----------------|-----------------|-----------|-------------|--------------|------------|----------------|-----------------------|
| Pt_1   | 0.9703094          | 92             | 0.9555849       | 418       | 0.5649719   | 0.97091013   | 0.39550638 | 25681          | 0.6825259             |
| Pt_3   | 0.9734691          | 67             | 0.94243485      | 451       | 0.52546763  | 0.9741104    | 0.39176112 | 26250          | 0.6348773             |
| Pt_4   | 0.97487175         | 100            | 0.951503        | 430       | 0.58998275  | 0.975475     | 0.34794357 | 25049          | 0.6030638             |
| Pt_5   | 0.97500455         | 3793           | 0.9645156       | 536       | 0.63145006  | 0.97576714   | 0.37334397 | 24644          | 0.54246277            |
| Pt_7   | 0.970839           | 50             | 0.954095        | 504       | 0.57221186  | 0.9715203    | 0.35785663 | 25535          | 0.6492417             |
| Pt_8   | 0.962071           | 67             | 0.95519966      | 507       | 0.42832255  | 0.96269435   | 0.38937375 | 25607          | 0.74423116            |
| Pt_9   | 0.9683872          | 124            | 0.9374307       | 434       | 0.40818152  | 0.96895516   | 0.39714733 | 26363          | 0.7549426             |
| Pt_10  | 0.9699443          | 91             | 0.9438644       | 479       | 0.47450688  | 0.97054577   | 0.39443582 | 25852          | 0.7069164             |
| Pt_11  | 0.9749382          | 54             | 0.9579407       | 472       | 0.4811238   | 0.9756304    | 0.40482184 | 25655          | 0.66060746            |
| Pt_12  | 0.9725238          | 79             | 0.9393635       | 411       | 0.49692604  | 0.97310144   | 0.42839283 | 26902          | 0.6818304             |
| Pt_13  | 0.9735868          | 57             | 0.94226354      | 446       | 0.6048979   | 0.97420466   | 0.38270766 | 24065          | 0.63423               |
| Pt_14  | 0.9753656          | 143            | 0.9608526       | 470       | 0.62667716  | 0.97597027   | 0.36961144 | 25206          | 0.63925457            |
| Pt_15  | 0.9678213          | 93             | 0.94389236      | 437       | 0.5291038   | 0.96851665   | 0.3892242  | 26185          | 0.7211983             |
| Pt_16  | 0.9648             | 50             | 0.9453052       | 600       | 0.40361378  | 0.9653414    | 0.37942418 | 24977          | 0.7911804             |
| Pt_17  | 0.97698164         | 122            | 0.9613474       | 452       | 0.59492195  | 0.97764295   | 0.41069722 | 25328          | 0.5982365             |
| Pt_18  | 0.96885425         | 58             | 0.9423119       | 535       | 0.32583874  | 0.9695432    | 0.4431309  | 26561          | 0.7873528             |

| Sample | 3' Norm    | Read Length | Mean Per Base Cov. | End 1 Mismatch Rate | Fragment Length StdDev | Estimated Library Size | Mapped    | Intergenic Rate |
|--------|------------|-------------|--------------------|---------------------|------------------------|------------------------|-----------|-----------------|
| Pt_1   | 0.6862117  | 151         | 83,61752           | 0.0025229577        | 251                    | 65925855               | 108027000 | 0,043806836     |
| Pt_3   | 0.67680407 | 151         | 67,22482           | 0.002534251         | 232                    | 54840640               | 108533323 | 0,057012435     |
| Pt_4   | 0.69160074 | 151         | 82,827736          | 0.0024538275        | 248                    | 49055291               | 109273544 | 0,04789277      |
| Pt_5   | 0.6338489  | 151         | 70,42719           | 0.0024966015        | 261                    | 34787331               | 95979678  | 0,03496831      |
| Pt_7   | 0.659212   | 151         | 72,77624           | 0.0026226582        | 229                    | 54409698               | 101888666 | 0,045314766     |
| Pt_8   | 0.63978    | 151         | 57,86288           | 0.0025600856        | 190                    | 78738156               | 98063542  | 0,044360522     |
| Pt_9   | 0.6452332  | 151         | 61,836433          | 0.0025568812        | 199                    | 96367346               | 113891338 | 0,06210294      |
| Pt_10  | 0.7010748  | 151         | 61,938477          | 0.0025903764        | 199                    | 67753437               | 100100497 | 0,055640772     |
| Pt_11  | 0.6900064  | 151         | 71,60971           | 0.002562218         | 235                    | 66005452               | 118200559 | 0,041602332     |
| Pt_12  | 0.66824174 | 151         | 78,72105           | 0.002382458         | 254                    | 76320301               | 125428290 | 0,060133643     |
| Pt_13  | 0.70398194 | 151         | 88,10936           | 0.0024144838        | 262                    | 53234869               | 105602884 | 0,0572138       |
| Pt_14  | 0.66996205 | 151         | 89,619316          | 0.002359957         | 279                    | 53433676               | 103989411 | 0,03861252      |
| Pt_15  | 0.6359463  | 151         | 76,67594           | 0.0024662386        | 211                    | 72090194               | 99949868  | 0,055545826     |
| Pt_16  | 0.70524687 | 151         | 41,508247          | 0.0025773195        | 182                    | 74851594               | 73047153  | 0,054209724     |
| Pt_17  | 0.6457579  | 151         | 84,99374           | 0.0024147357        | 269                    | 48027839               | 108875228 | 0,03810907      |
| Pt_18  | 0.65883225 | 151         | 40,176754          | 0.002585336         | 192                    | 93053358               | 92766882  | 0,057305206     |

| Sample | Total Purity Filtered Reads Sequenced | rRNA    | Failed Vendor QC Check | Mean CV    | Transcripts Detected | Mapped Pairs | Cumul. Gap Length | Gap %       |
|--------|---------------------------------------|---------|------------------------|------------|----------------------|--------------|-------------------|-------------|
| Pt_1   | 111263646                             | 1335942 | 0                      | 0.765735   | 133026               | 53918005     | 32105             | 0.017732171 |
| Pt_3   | 111417878                             | 859700  | 0                      | 0.7684564  | 134873               | 54184007     | 33137             | 0.019015664 |
| Pt_4   | 112020856                             | 1202319 | 0                      | 0.7548408  | 129699               | 54547193     | 35502             | 0.020376502 |
| Pt_5   | 98363304                              | 1465023 | 0                      | 0.7732993  | 129562               | 47913664     | 39548             | 0.021984095 |
| Pt_7   | 104875492                             | 787300  | 0                      | 0.7771083  | 132115               | 50861466     | 45671             | 0.024843866 |
| Pt_8   | 101863636                             | 696950  | 0                      | 0.7799276  | 131699               | 48952513     | 37343             | 0.021024393 |
| Pt_9   | 117540362                             | 816905  | 0                      | 0.7477298  | 133997               | 56858733     | 31867             | 0.017842595 |
| Pt_10  | 103138358                             | 921541  | 0                      | 0.75257456 | 132162               | 49966429     | 38023             | 0.021919379 |
| Pt_11  | 121153004                             | 947537  | 0                      | 0.76727647 | 132148               | 59011542     | 32981             | 0.019162243 |
| Pt_12  | 128895392                             | 1311510 | 0                      | 0.76444083 | 136047               | 62620697     | 29272             | 0.016424377 |
| Pt_13  | 108399072                             | 2464019 | 0                      | 0.768121   | 126256               | 52715240     | 32843             | 0.01824596  |
| Pt_14  | 106549766                             | 1461969 | 0                      | 0.7633192  | 131236               | 51912528     | 38387             | 0.022343576 |
| Pt_15  | 103198922                             | 1227860 | 0                      | 0.7781335  | 132805               | 49886506     | 34967             | 0.019259261 |
| Pt_16  | 75669758                              | 417924  | 0                      | 0.77818346 | 130178               | 36465089     | 44610             | 0.02273472  |
| Pt_17  | 111365028                             | 1180803 | 0                      | 0.7755451  | 131531               | 54345155     | 37988             | 0.020580744 |
| Pt_18  | 95681018                              | 380714  | 0                      | 0.7597193  | 134777               | 46315657     | 39944             | 0.022498313 |

| Sample | Unpaired Reads | Intronic Rate | Mapped Unique Rate of Total | Expression Profiling Efficiency | Mapped Unique | End 2 Mismatch Rate | End 2 Antisense | Alternative Alignments | End 2 Sense |
|--------|----------------|---------------|-----------------------------|---------------------------------|---------------|---------------------|-----------------|------------------------|-------------|
| Pt_1   | 0              | 0.39061293    | 0.66267127                  | 0.54853696                      | 73731222      | 0.0054415874        | 43149588        | 10462333               | 2504823     |
| Pt_3   | 0              | 0.41696724    | 0.6184406                   | 0.5118635                       | 68905346      | 0.0059883944        | 44119201        | 6419991                | 1603549     |
| Pt_4   | 0              | 0.36152026    | 0.58827364                  | 0.5755134                       | 65898920      | 0.005550844         | 43131330        | 9711883                | 2195288     |
| Pt_5   | 0              | 0.33306554    | 0.5293174                   | 0.61614823                      | 52065404      | 0.006309482         | 39248400        | 7040502                | 1257857     |
| Pt_7   | 0              | 0.38188314    | 0.6307515                   | 0.5559154                       | 66150370      | 0.006080397         | 41286378        | 6425832                | 1567460     |
| Pt_8   | 0              | 0.52687705    | 0.71646714                  | 0.4123437                       | 72981943      | 0.005571866         | 40387772        | 7114732                | 1686969     |
| Pt_9   | 0              | 0.5292492     | 0.7315055                   | 0.3955096                       | 85981422      | 0.0056685223        | 45743414        | 7939955                | 2258982     |
| Pt_10  | 0              | 0.46935758    | 0.6860947                   | 0.46053064                      | 70762680      | 0.0055449335        | 39350176        | 8127914                | 2903736     |
| Pt_11  | 0              | 0.47681692    | 0.6445087                   | 0.46939903                      | 78084168      | 0.0058204797        | 49081288        | 7278415                | 1561802     |
| Pt_12  | 0              | 0.44243738    | 0.6634902                   | 0.48355943                      | 85520826      | 0.00566683          | 49658250        | 9993419                | 2787310     |
| Pt_13  | 0              | 0.33736566    | 0.61786985                  | 0.5892944                       | 66976517      | 0.005460283         | 41480356        | 15148043               | 2314317     |
| Pt_14  | 0              | 0.3341755     | 0.62389344                  | 0.6116183                       | 66475703      | 0.0054367674        | 41639055        | 8058333                | 2111966     |
| Pt_15  | 0              | 0.41478848    | 0.6984926                   | 0.5124458                       | 72083679      | 0.0055430355        | 40360587        | 7853672                | 1748511     |
| Pt_16  | 0              | 0.5416915     | 0.76375914                  | 0.38962507                      | 57793473      | 0.0058404915        | 29783068        | 4977404                | 1261137     |
| Pt_17  | 0              | 0.36642545    | 0.5848617                   | 0.5816212                       | 65133138      | 0.0053868135        | 43826909        | 6745202                | 2313039     |
| Pt_18  | 0              | 0.6164732     | 0.7633726                   | 0.31591475                      | 73040267      | 0.005919033         | 38607075        | 4353559                | 1446730     |

| Sample | Fragment Length Mean | End 1 Antisense | Split Reads | Base Mismatch Rate | End 1 Sense | End 1 % Sense | rRNA rate  | End 1 Mapping Rate | No. Covered 5' | Duplication Rate of Mapped | End 2 % Sense |
|--------|----------------------|-----------------|-------------|--------------------|-------------|---------------|------------|--------------------|----------------|----------------------------|---------------|
| Pt_1   | 216                  | 2484286         | 19526583    | 0.003980765        | 43300574    | 94.574005     | 0,01200699 | 0.9715108          | 915            | 0,31747413                 | 5.4864864     |
| Pt_3   | 197                  | 1593292         | 18236867    | 0.0042588436       | 44283294    | 96.52701      | 0,007716   | 0.97475183         | 929            | 0,36512268                 | 3.507114      |
| Pt_4   | 229                  | 2174538         | 21225443    | 0.003999764        | 43307054    | 95.218864     | 0,01073299 | 0.9760782          | 907            | 0,39693618                 | 4.8432646     |
| Pt_5   | 206                  | 1244174         | 21764944    | 0.004397553        | 39482829    | 96.94508      | 0,014894   | 0.9765296          | 916            | 0,45753717                 | 3.10534       |
| Pt_7   | 201                  | 1555706         | 18221090    | 0.0043485765       | 41434624    | 96.38127      | 0,007507   | 0.9722015          | 907            | 0,3507583                  | 3.6576886     |
| Pt_8   | 145                  | 1676154         | 13436928    | 0.0040637725       | 40505808    | 96.026375     | 0,00684199 | 0.9633177          | 907            | 0,25576887                 | 4.009458      |
| Pt_9   | 163                  | 2245645         | 14546061    | 0.0041108006       | 45879692    | 95.333755     | 0,00695    | 0.96952313         | 921            | 0,24505742                 | 4.705978      |
| Pt_10  | 165                  | 2884206         | 14975346    | 0.004065584        | 39491881    | 93.19379      | 0,008935   | 0.9711472          | 890            | 0,2930836                  | 6.872112      |
| Pt_11  | 194                  | 1551926         | 19040300    | 0.0041890186       | 49268968    | 96.94627      | 0,007821   | 0.97632265         | 916            | 0,33939257                 | 3.083939      |
| Pt_12  | 220                  | 2768597         | 20706847    | 0.004021682        | 49849164    | 94.73829      | 0,010175   | 0.973679           | 932            | 0,31816956                 | 5.314673      |
| Pt_13  | 227                  | 2287827         | 21825731    | 0.0039355285       | 41664152    | 94.79471      | 0,022731   | 0.9748226          | 915            | 0,36577                    | 5.2844715     |
| Pt_14  | 228                  | 2091772         | 23626565    | 0.0038962157       | 41882079    | 95.24315      | 0,013721   | 0.9765751          | 919            | 0,36074546                 | 4.8272386     |
| Pt_15  | 175                  | 1732425         | 18684967    | 0.0040024337       | 40532005    | 95.90098      | 0,01189799 | 0.96921194         | 919            | 0,27880165                 | 4.1523356     |
| Pt_16  | 145                  | 1252015         | 9060102     | 0.004207885        | 29854688    | 95.9751       | 0,005523   | 0.9658828          | 888            | 0,20881964                 | 4.062391      |
| Pt_17  | 223                  | 2295304         | 23528954    | 0.0038985948       | 44043315    | 95.04667      | 0,010603   | 0.9783042          | 924            | 0,40176344                 | 5.013094      |
| Pt_18  | 147                  | 1439666         | 9281517     | 0.004249577        | 38722238    | 96.41535      | 0,00397899 | 0.9702322          | 913            | 0,21264718                 | 3.6119664     |

**Supplementary Table 5**  
**Significantly DE genes, Ph+ ALL vs Ph- ALL**

| baseMean         | log2FoldChange   | lfcSE             | stat             | pvalue               | padj                 | symbol  | description                                                                                                        |
|------------------|------------------|-------------------|------------------|----------------------|----------------------|---------|--------------------------------------------------------------------------------------------------------------------|
| 510.823126235093 | 6.1781819250172  | 0.510724249265082 | 11.4365596373187 | 2.7455829120501e-30  | 8.99672608620577e-26 | RASSF8  | Ras association domain family member 8 [Source:HGNC Symbol;Acc:HGNC:13232]                                         |
| 992.375377231769 | 6.0251100308979  | 0.549907948027653 | 10.620009173233  | 2.405374839793e-26   | 3.94096613751685e-22 | VWA2    | von Willebrand factor A domain containing 2 [Source:HGNC Symbol;Acc:HGNC:24709]                                    |
| 3412.40549450382 | 5.9272440847987  | 0.550557634962839 | 10.5660147432035 | 4.28311063732102e-26 | 4.67829897879117e-22 | SPATS2L | spermatogenesis associated serine rich 2 like [Source:HGNC Symbol;Acc:HGNC:24574]                                  |
| 12.0984486737449 | 5.4145743964054  | 0.728017005382373 | 4.38043581962695 | 1.18442175441198e-05 | 0.0021208268879001   | KRT27   | keratin 27 [Source:HGNC Symbol;Acc:HGNC:30841]                                                                     |
| 47.9956907482506 | 5.1562691206200  | 0.676238680180923 | 5.43963436899205 | 5.33900289572388e-08 | 2.3941318331954e-05  | TDRD1   | tudor domain containing 1 [Source:HGNC Symbol;Acc:HGNC:11712]                                                      |
| 272.305712086428 | 4.9962896024064  | 0.575188922770756 | 8.42761695486863 | 3.52775627193521e-17 | 1.92662529197955e-13 | WNT9A   | Wnt family member 9A [Source:HGNC Symbol;Acc:HGNC:12778]                                                           |
| 2785.6751780536  | 4.9297095924035  | 0.606953218594804 | 7.65478889914483 | 1.93630050303468e-14 | 6.34486948834404e-11 | EPHA4   | EPH receptor A4 [Source:HGNC Symbol;Acc:HGNC:3388]                                                                 |
| 583.97670139018  | 4.82760666063481 | 0.451950601784524 | 10.1287664774531 | 4.11811543604147e-24 | 3.37356016520517e-20 | ELFN2   | extracellular leucine rich repeat and fibronectin type III domain containing 2 [Source:HGNC Symbol;Acc:HGNC:29396] |
| 18.3937735401898 | 4.6622875616358  | 0.706385464859642 | 3.75871935839942 | 0.000170785269175063 | 0.0171140418970289   | C7orf72 | chromosome 7 open reading frame 72 [Source:HGNC Symbol;Acc:HGNC:22564]                                             |
| 274.216400103606 | 4.5026301018972  | 0.563389609860655 | 7.55011039849341 | 4.34889445583871e-14 | 1.29549612299021e-10 | TSPAN15 | tetraspanin 15 [Source:HGNC Symbol;Acc:HGNC:23298]                                                                 |
| 62.3655561073093 | 4.4399699283472  | 0.726085977032482 | 5.59606787848946 | 2.19267882660479e-08 | 1.15886612564815e-05 | FOLH1   | folate hydrolase 1 [Source:HGNC Symbol;Acc:HGNC:3788]                                                              |
| 62.3655561073093 | 4.4399699283472  | 0.726085977032482 | 5.59606787848946 | 2.19267882660479e-08 | 1.15886612564815e-05 | FOLH1   | folate hydrolase 1 [Source:HGNC Symbol;Acc:HGNC:3788]                                                              |
| 167.687089090495 | 4.3222375484768  | 0.625597992685337 | 6.51443367326765 | 7.2964412934216e-11  | 1.039520818708e-07   | RAB3B   | RAB3B, member RAS oncogene family [Source:HGNC Symbol;Acc:HGNC:9778]                                               |
| 3023.08903143141 | 4.3116715096329  | 0.640521476241148 | 6.81903780851433 | 9.16522802332956e-12 | 1.76662465804978e-08 | THBS1   | thrombospondin 1 [Source:HGNC Symbol;Acc:HGNC:11785]                                                               |
| 2609.63964244476 | 4.2091532696017  | 0.721501578313883 | 7.91330384737237 | 2.50646618864822e-15 | 9.12576489662498e-12 | ADGRF1  | adhesion G protein-coupled receptor F1 [Source:HGNC Symbol;Acc:HGNC:18990]                                         |
| 248.567476424885 | 4.1298854486015  | 0.638796251440734 | 6.13903570646704 | 8.30239060719448e-10 | 7.15928251096181e-07 | FAM19A1 | family with sequence similarity 19 member A1, C-C motif chemokine like [Source:HGNC Symbol;Acc:HGNC:21587]         |

|                  |                   |                   |                  |                      |                      |          |                                                                                                             |
|------------------|-------------------|-------------------|------------------|----------------------|----------------------|----------|-------------------------------------------------------------------------------------------------------------|
| 1443.84169021088 | 4.06511978499697  | 0.581339198746792 | 6.77452305488507 | 1.24817330339031e-11 | 2.27223015586076e-08 | NRXN3    | neurexin 3 [Source:HGNC Symbol;Acc:HGNC:8010]                                                               |
| 92.5650376338721 | 4.024021942807112 | 0.721920090798912 | 5.48799204717173 | 4.06528363364019e-08 | 1.95898844275179e-05 | FAM26E   | family with sequence similarity 26 member E [Source:HGNC Symbol;Acc:HGNC:21568]                             |
| 31.850891426268  | 4.00598356013999  | 0.73121231717337  | 5.46236632506116 | 4.69829296803455e-08 | 2.23121252139936e-05 | ECEL1    | endothelin converting enzyme like 1 [Source:HGNC Symbol;Acc:HGNC:3147]                                      |
| 84.9155808703953 | 3.99019014899644  | 0.647041948107846 | 5.85971770378364 | 4.63654678533692e-09 | 3.30283402308522e-06 | TMEM200A | transmembrane protein 200A [Source:HGNC Symbol;Acc:HGNC:21075]                                              |
| 99.67939668883   | 3.97248248904245  | 0.658049418699296 | 5.62423299748362 | 1.86334011844678e-08 | 1.0348801525638e-05  | SCNN1A   | sodium channel epithelial 1 alpha subunit [Source:HGNC Symbol;Acc:HGNC:10599]                               |
| 319.601567725369 | 3.92370598277281  | 0.683263359613508 | 5.51562438211092 | 3.47543838401687e-08 | 1.7362934655859e-05  | SLCO2B1  | solute carrier organic anion transporter family member 2B1 [Source:HGNC Symbol;Acc:HGNC:10962]              |
| 185.393784185002 | 3.89690401068281  | 0.684984220882157 | 5.39017974390012 | 7.03872467762745e-08 | 3.03480171363811e-05 | MIPOL1   | mirror-image polydactyly 1 [Source:HGNC Symbol;Acc:HGNC:21460]                                              |
| 345.724779437813 | 3.87197963754537  | 0.543584596695772 | 6.6856074826033  | 2.29968660504799e-11 | 3.96611214074803e-08 | SLC2A9   | solute carrier family 2 member 9 [Source:HGNC Symbol;Acc:HGNC:13446]                                        |
| 71.5452845721131 | 3.86883606279076  | 0.706718997136342 | 5.08660936508859 | 3.6452155569047e-07  | 0.000119446423368653 | PDE3A    | phosphodiesterase 3A [Source:HGNC Symbol;Acc:HGNC:8778]                                                     |
| 33.675329512224  | 3.84943915669472  | 0.670427580916489 | 5.3120459066684  | 1.08401285866132e-07 | 4.55396581443773e-05 | OCA2     | OCA2 melanosomal transmembrane protein [Source:HGNC Symbol;Acc:HGNC:8101]                                   |
| 58.4694201314098 | 3.81268067554541  | 0.643040808537259 | 5.39103890208434 | 7.0051506227293e-08  | 3.03480171363811e-05 | MYL9     | myosin light chain 9 [Source:HGNC Symbol;Acc:HGNC:15754]                                                    |
| 55.5704958709243 | 3.80162279910268  | 0.733673569569015 | 3.62967212275803 | 0.000283781451777695 | 0.0255465676149767   | NPNT     | nephronectin [Source:HGNC Symbol;Acc:HGNC:27405]                                                            |
| 64.9714947833498 | 3.79811561921893  | 0.459899526138947 | 7.45167004710992 | 9.21659970230747e-14 | 2.32315030034778e-10 | PTGIR    | prostaglandin I2 (prostacyclin) receptor (IP) [Source:HGNC Symbol;Acc:HGNC:9602]                            |
| 78.3693633018104 | 3.76195208759422  | 0.724096429486424 | 5.17118525862309 | 2.32613808915304e-07 | 8.56436998936705e-05 | ADAMTSL1 | ADAMTS like 1 [Source:HGNC Symbol;Acc:HGNC:14632]                                                           |
| 125.318529860571 | 3.76097360422327  | 0.689991729924242 | 5.80299999517841 | 6.51387934152432e-09 | 4.44680829714727e-06 | PRTFDC1  | phosphoribosyl transferase domain containing 1 [Source:HGNC Symbol;Acc:HGNC:23333]                          |
| 132.207238414845 | 3.74422240681951  | 0.725715429874067 | 5.69557562454696 | 1.22956368728451e-08 | 7.74814286633438e-06 | INHBB    | inhibin beta B subunit [Source:HGNC Symbol;Acc:HGNC:6067]                                                   |
| 39.1455254073129 | 3.727879725027586 | 0.760490959834886 | 4.28135093734089 | 1.85762137425138e-05 | 0.00292646813420525  | PIK3C2G  | phosphatidylinositol-4-phosphate 3-kinase catalytic subunit type 2 gamma [Source:HGNC Symbol;Acc:HGNC:8973] |
| 1271.36265979161 | 3.71949812086204  | 0.543303613699744 | 6.20911299499079 | 5.3284500225972e-10  | 5.13537206883721e-07 | COL6A3   | collagen type VI alpha 3 chain [Source:HGNC Symbol;Acc:HGNC:2213]                                           |

|                  |                   |                   |                  |                      |                      |          |                                                                                            |
|------------------|-------------------|-------------------|------------------|----------------------|----------------------|----------|--------------------------------------------------------------------------------------------|
| 224.27599644967  | 3.70541511980296  | 0.713862945638904 | 4.93947825512901 | 7.83318777999013e-07 | 0.00022515605015326  | CALCRL   | calcitonin receptor like receptor [Source:HGNC Symbol;Acc:HGNC:16709]                      |
| 14.9922100514803 | 3.65364533260565  | 0.747419530532784 | 3.42193804002115 | 0.000621764808350365 | 0.0444846926638095   | PRTG     | protogenin [Source:HGNC Symbol;Acc:HGNC:26373]                                             |
| 712.458476047292 | 3.61800612119657  | 0.713476225079469 | 6.03691203952094 | 1.57091295194917e-09 | 1.28689189023676e-06 | PEG10    | paternally expressed 10 [Source:HGNC Symbol;Acc:HGNC:14005]                                |
| 27.3904469501444 | 3.61237918701457  | 0.737309803116808 | 4.50753511661495 | 6.55850785598893e-06 | 0.00127922134181574  | CREB3L1  | cAMP responsive element binding protein 3 like 1 [Source:HGNC Symbol;Acc:HGNC:18856]       |
| 601.939247339719 | 3.57798754292614  | 0.772914358835407 | 6.42536061153399 | 1.31557266961338e-10 | 1.65802635530351e-07 | CHRD1    | chordin like 1 [Source:HGNC Symbol;Acc:HGNC:29861]                                         |
| 9.74616264015071 | 3.57400629998528  | 0.754429749368352 | 4.57335822613119 | 4.79968488792861e-06 | 0.000970839965479287 | LY6H     | lymphocyte antigen 6 family member H [Source:HGNC Symbol;Acc:HGNC:6728]                    |
| 113.49916301203  | 3.56708251963466  | 0.721163885081507 | 4.68892093977547 | 2.7464946606755e-06  | 0.00061222542204772  | SLC25A27 | solute carrier family 25 member 27 [Source:HGNC Symbol;Acc:HGNC:21065]                     |
| 7.70736966364097 | 3.55805598164736  | 0.727391004660636 | 4.32744222636097 | 1.5085089583829e-05  | 0.00248878364991827  | DRD5     | dopamine receptor D5 [Source:HGNC Symbol;Acc:HGNC:3026]                                    |
| 360.403045461619 | 3.55367581954101  | 0.734790676989201 | 5.1253535268495  | 2.96979968759987e-07 | 0.000104639135659433 | GHR      | growth hormone receptor [Source:HGNC Symbol;Acc:HGNC:4263]                                 |
| 9.1532143879798  | 3.53459649364628  | 0.635596842824641 | 4.39490878585734 | 1.10819276755151e-05 | 0.00199523409929274  | MFSD6L   | major facilitator superfamily domain containing 6 like [Source:HGNC Symbol;Acc:HGNC:26656] |
| 3453.45729520424 | 3.52623957432316  | 0.616751252541937 | 5.63716911747861 | 1.7286832708813e-08  | 9.9378058631997e-06  | MYO1B    | myosin IB [Source:HGNC Symbol;Acc:HGNC:7596]                                               |
| 187.515329565255 | 3.51188937402791  | 0.728064762017026 | 5.19458716392404 | 2.05174627611136e-07 | 7.72777264087551e-05 | NR5A2    | nuclear receptor subfamily 5 group A member 2 [Source:HGNC Symbol;Acc:HGNC:7984]           |
| 383.408987907231 | 3.51184554718283  | 0.748028233199231 | 4.69814729953578 | 2.62532071206865e-06 | 0.000593078060968642 | PLOD2    | procollagen-lysine,2-oxoglutarate 5-dioxygenase 2 [Source:HGNC Symbol;Acc:HGNC:9082]       |
| 490.438660988447 | 3.50222326347875  | 0.657950492000953 | 5.14665140176464 | 2.65177451571142e-07 | 9.54871948690461e-05 | KALRN    | kalirin RhoGEF kinase [Source:HGNC Symbol;Acc:HGNC:4814]                                   |
| 25.5848642018504 | 3.502046264621186 | 0.730217370554286 | 4.29626912334481 | 1.73696692524261e-05 | 0.00274961025151449  | MEI4     | meiotic double-stranded break formation protein 4 [Source:HGNC Symbol;Acc:HGNC:43638]      |
| 213.920169827789 | 3.49773810418716  | 0.67830597551644  | 5.53774849010095 | 3.06384816269487e-08 | 1.56869025929977e-05 | TMEM100  | transmembrane protein 100 [Source:HGNC Symbol;Acc:HGNC:25607]                              |
| 24.866291910307  | 3.49463615753624  | 0.762351581034244 | 4.74654856921004 | 2.06917055811663e-06 | 0.000502241339617525 | PON3     | paraoxonase 3 [Source:HGNC Symbol;Acc:HGNC:9206]                                           |
| 364.343434765837 | 3.48625807562883  | 0.731361830858266 | 5.50828178309951 | 3.62353055689353e-08 | 1.77217685504906e-05 | FAM171B  | family with sequence similarity 171 member B [Source:HGNC Symbol;Acc:HGNC:29412]           |

|                      |                       |                       |                      |                          |                          |          |                                                                                                       |
|----------------------|-----------------------|-----------------------|----------------------|--------------------------|--------------------------|----------|-------------------------------------------------------------------------------------------------------|
| 272.7362162786<br>11 | 3.4842579967666<br>8  | 0.6614296499515<br>24 | 5.115051457205<br>77 | 3.13655438237867e-<br>07 | 0.000107061056251<br>859 | MUC4     | mucin 4, cell surface associated<br>[Source:HGNC Symbol;Acc:HGNC:7514]                                |
| 2281.970115860<br>43 | 3.4794826490465<br>1  | 0.7393005250288<br>94 | 4.727484650293<br>75 | 2.27318242044868e-<br>06 | 0.000539765518501<br>901 | POU4F1   | POU class 4 homeobox 1 [Source:HGNC<br>Symbol;Acc:HGNC:9218]                                          |
| 26.06501097553<br>84 | 3.4685998267301<br>7  | 0.7649528981133<br>86 | 4.737108910469<br>07 | 2.16788674196852e-<br>06 | 0.000518520531100<br>909 | SHISA6   | shisa family member 6 [Source:HGNC<br>Symbol;Acc:HGNC:34491]                                          |
| 84.16334615272<br>77 | 3.3915295737625       | 0.6068344681708<br>25 | 5.116365668338<br>13 | 3.1147893285896e-<br>07  | 0.000107061056251<br>859 | GDPD4    | glycerophosphodiester phosphodiesterase<br>domain containing 4 [Source:HGNC<br>Symbol;Acc:HGNC:24849] |
| 68.48474563389<br>76 | 3.3852497676553<br>7  | 0.7525453263322<br>51 | 4.343792812297<br>73 | 1.40043600968369e-<br>05 | 0.002365716486358<br>56  | ADAMTS9  | ADAM metalloproteinase with<br>thrombospondin type 1 motif 9<br>[Source:HGNC Symbol;Acc:HGNC:13202]   |
| 19.93567451160<br>9  | 3.3609223966975<br>3  | 0.7292664633155<br>3  | 4.230275265283<br>5  | 2.33405523351187e-<br>05 | 0.003590719337639<br>29  | SPAAR    | small regulatory polypeptide of amino acid<br>response [Source:HGNC<br>Symbol;Acc:HGNC:27244]         |
| 195.6428802087<br>17 | 3.3537679639500<br>3  | 0.7103748436766<br>27 | 4.927793359098<br>61 | 8.31635026833332e-<br>07 | 0.000234922556545<br>471 | ANTXR1   | anthrax toxin receptor 1 [Source:HGNC<br>Symbol;Acc:HGNC:21014]                                       |
| 192.4437582647<br>41 | 3.3319582699559<br>02 | 0.6443760597213<br>02 | 4.655570481443<br>15 | 3.23084855526562e-<br>06 | 0.000710526479590<br>226 | TSPYL5   | TSPY like 5 [Source:HGNC<br>Symbol;Acc:HGNC:29367]                                                    |
| 21.79558929200<br>75 | 3.3270606291350<br>4  | 0.7140900641444<br>09 | 4.442836862329<br>73 | 8.87804807172338e-<br>06 | 0.001662376452652<br>75  | MAS1     | MAS1 proto-oncogene, G protein-coupled<br>receptor [Source:HGNC<br>Symbol;Acc:HGNC:6899]              |
| 237.4014055309<br>33 | 3.3124848852074<br>09 | 0.6645428878728<br>09 | 4.605155559784<br>78 | 4.12157647033987e-<br>06 | 0.000860228138726<br>731 | STK33    | serine/threonine kinase 33 [Source:HGNC<br>Symbol;Acc:HGNC:14568]                                     |
| 24.23708591329<br>1  | 3.3034455496769<br>01 | 0.7698264616607<br>01 | 4.559249991932<br>98 | 5.13366312644163e-<br>06 | 0.001032023762743<br>8   | RHOJ     | ras homolog family member J<br>[Source:HGNC Symbol;Acc:HGNC:688]                                      |
| 1632.339746708<br>22 | 3.2849827769351<br>92 | 0.7247233189536<br>92 | 7.379760365818<br>33 | 1.58574685954528e-<br>13 | 3.71155379239854e-<br>10 | CCL17    | C-C motif chemokine ligand 17<br>[Source:HGNC Symbol;Acc:HGNC:10615]                                  |
| 222.1247737934<br>43 | 3.2752838391514<br>5  | 0.7447011243169<br>86 | 4.331686143782<br>51 | 1.4797177183407e-<br>05  | 0.002461288842364<br>88  | C18orf63 | chromosome 18 open reading frame 63<br>[Source:HGNC Symbol;Acc:HGNC:40037]                            |
| 93.34429888956<br>22 | 3.2478503260849<br>31 | 0.6883628337624<br>31 | 4.779407475469<br>35 | 1.75812556571779e-<br>06 | 0.000429927302518<br>212 | DLGAP2   | DLG associated protein 2 [Source:HGNC<br>Symbol;Acc:HGNC:2906]                                        |
| 906.0062205893<br>64 | 3.2332991721439<br>9  | 0.5313958916639<br>15 | 5.729110767917<br>04 | 1.00958457582909e-<br>08 | 6.48667987858191e-<br>06 | PTP4A3   | protein tyrosine phosphatase type IVA,<br>member 3 [Source:HGNC<br>Symbol;Acc:HGNC:9636]              |
| 100.2496096468<br>8  | 3.1980833430798<br>4  | 0.6630589689775<br>09 | 4.357436272152<br>37 | 1.3159479699038e-<br>05  | 0.002276948450876<br>45  | HSPA12B  | heat shock protein family A (Hsp70)<br>member 12B [Source:HGNC<br>Symbol;Acc:HGNC:16193]              |
| 26.94433802537<br>66 | 3.1717863618157<br>9  | 0.7459078058423<br>97 | 4.335367315906<br>15 | 1.45516927596451e-<br>05 | 0.002432805450755<br>37  | OPN4     | opsin 4 [Source:HGNC<br>Symbol;Acc:HGNC:14449]                                                        |
| 1411.355604298<br>43 | 3.1618427118697<br>8  | 0.6215277515868<br>93 | 5.208159015795<br>72 | 1.90723447505206e-<br>07 | 7.26700689284954e-<br>05 | CCR6     | C-C motif chemokine receptor 6<br>[Source:HGNC Symbol;Acc:HGNC:1607]                                  |

|                      |                       |                       |                      |                          |                          |           |                                                                                                           |
|----------------------|-----------------------|-----------------------|----------------------|--------------------------|--------------------------|-----------|-----------------------------------------------------------------------------------------------------------|
| 1723.136191718<br>94 | 3.1566080221474<br>2  | 0.6138383265493<br>94 | 4.880036665071<br>01 | 1.06066119887849e-<br>06 | 0.000289631218040<br>42  | PON2      | paraoxonase 2 [Source:HGNC<br>Symbol;Acc:HGNC:9205]                                                       |
| 600.2025329824<br>16 | 3.1562244097341<br>5  | 0.7481397492627<br>6  | 5.437390034272<br>3  | 5.40666978932066e-<br>08 | 2.3941318331954e-<br>05  | LPL       | lipoprotein lipase [Source:HGNC<br>Symbol;Acc:HGNC:6677]                                                  |
| 13.43113008474<br>31 | 3.1380976824467<br>4  | 0.6458781581104<br>18 | 4.223220826906<br>11 | 2.40835639146237e-<br>05 | 0.003687711319413<br>04  | DAGLA     | diacylglycerol lipase alpha [Source:HGNC<br>Symbol;Acc:HGNC:1165]                                         |
| 292.9116131833<br>44 | 3.1149063728454<br>7  | 0.7477027169469<br>12 | 4.233642772672<br>84 | 2.29936090061352e-<br>05 | 0.003554031037325<br>65  | LYVE1     | lymphatic vessel endothelial hyaluronan<br>receptor 1 [Source:HGNC<br>Symbol;Acc:HGNC:14687]              |
| 809.2603148801<br>12 | 3.1144145586476<br>8  | 0.4436621688527<br>89 | 6.298709426135<br>48 | 3.00134017752313e-<br>10 | 3.39130741162338e-<br>07 | PLXDC2    | plexin domain containing 2 [Source:HGNC<br>Symbol;Acc:HGNC:21013]                                         |
| 65.77123427354<br>53 | 3.0922082420609<br>5  | 0.7185466544455<br>58 | 4.346530525162<br>71 | 1.38307811229744e-<br>05 | 0.002360453311654<br>3   | MATN3     | matrilin 3 [Source:HGNC<br>Symbol;Acc:HGNC:6909]                                                          |
| 863.6921679445<br>51 | 3.0892323656652<br>3  | 0.7680472450352<br>47 | 6.224311370885<br>8  | 4.8367566578685e-<br>10  | 4.80275279287985e-<br>07 | LDB3      | LIM domain binding 3 [Source:HGNC<br>Symbol;Acc:HGNC:15710]                                               |
| 828.7350916217<br>45 | 3.0788534501497<br>2  | 0.7648063834143<br>98 | 5.437964151256<br>02 | 5.38928141914519e-<br>08 | 2.3941318331954e-<br>05  | ABCA9     | ATP binding cassette subfamily A member<br>9 [Source:HGNC Symbol;Acc:HGNC:39]                             |
| 203.6438344554<br>44 | 3.0685648804572<br>7  | 0.6034519941306<br>84 | 4.521295984091<br>77 | 6.14621780809844e-<br>06 | 0.001220601606883<br>45  | MCF2L     | MCF.2 cell line derived transforming<br>sequence like [Source:HGNC<br>Symbol;Acc:HGNC:14576]              |
| 797.3628838254<br>21 | 3.0643529514408<br>05 | 0.5531951782474<br>05 | 4.860701331703<br>68 | 1.16970614791655e-<br>06 | 0.000306631448439<br>436 | KCNE3     | potassium voltage-gated channel<br>subfamily E regulatory subunit 3<br>[Source:HGNC Symbol;Acc:HGNC:6243] |
| 266.4181835611<br>01 | 3.0596719899705<br>2  | 0.6241615222240<br>46 | 4.642010408862<br>59 | 3.45035474802874e-<br>06 | 0.000748174686453<br>628 | TNFRSF11A | TNF receptor superfamily member 11a<br>[Source:HGNC Symbol;Acc:HGNC:11908]                                |
| 598.7561614692<br>94 | 3.0431524566899<br>5  | 0.6810415009870<br>97 | 4.600451912530<br>71 | 4.21575336914675e-<br>06 | 0.000868816392454<br>093 | ENPP2     | pyrophosphatase/phosphodiesterase 2<br>[Source:HGNC Symbol;Acc:HGNC:3357]                                 |
| 24.36266648742<br>86 | 3.0318156671069<br>21 | 0.6897554777873<br>21 | 3.997284867487<br>09 | 6.40731770417982e-<br>05 | 0.008201366661350<br>17  | JPH2      | junctophilin 2 [Source:HGNC<br>Symbol;Acc:HGNC:14202]                                                     |
| 1063.783013885<br>32 | 3.0154472279165<br>3  | 0.5936156127116<br>43 | 4.713414215578<br>97 | 2.43600304006529e-<br>06 | 0.000566120195864<br>251 | PRKCA     | protein kinase C alpha [Source:HGNC<br>Symbol;Acc:HGNC:9393]                                              |
| 328.3604973253<br>23 | 3.0078576480640<br>6  | 0.7294424032277<br>4  | 4.132687213946<br>8  | 3.58546509179572e-<br>05 | 0.005064160350343<br>19  | PCLO      | piccolo presynaptic cytomatrix protein<br>[Source:HGNC Symbol;Acc:HGNC:13406]                             |
| 13.08526780914<br>26 | 3.0067695756075<br>9  | 0.7630394918862<br>29 | 3.519792516395<br>83 | 0.000431884506527<br>388 | 0.034349493956042<br>4   | GRM8      | glutamate metabotropic receptor 8<br>[Source:HGNC Symbol;Acc:HGNC:4600]                                   |
| 111.6724657671<br>01 | 3.0062693755836<br>5  | 0.7752301808224<br>9  | 4.311766993892<br>79 | 1.61955054883093e-<br>05 | 0.002630136904384<br>15  | PCDH15    | protocadherin related 15 [Source:HGNC<br>Symbol;Acc:HGNC:14674]                                           |
| 880.4257324093<br>31 | 3.0035948846544<br>5  | 0.6538451721895<br>05 | 4.359662709566<br>05 | 1.30263067268553e-<br>05 | 0.002270457546944<br>66  | TUNAR     | TCL1 upstream neural differentiation-<br>associated RNA [Source:HGNC<br>Symbol;Acc:HGNC:44088]            |



|                |                 |                 |                |                    |                   |           |                                           |
|----------------|-----------------|-----------------|----------------|--------------------|-------------------|-----------|-------------------------------------------|
| 10.85269318765 | 2.8366008924855 | 0.7645765605402 | 3.554245320319 | 0.000379065447851  | 0.031367928456727 |           | transmembrane channel like 1              |
| 88             | 2               | 86              | 08             | 711                | 7                 | TMC1      | [Source:HGNC Symbol;Acc:HGNC:16513]       |
| 5.827320339427 | 2.8247632579926 | 0.6291533278220 | 3.615819326533 | 0.000299399148556  | 0.026302175066793 |           | leucine rich repeat containing 74A        |
| 62             | 7               | 04              | 82             | 941                | 1                 | LRRC74A   | [Source:HGNC Symbol;Acc:HGNC:23346]       |
| 554.3282596082 | 2.8126984243879 | 0.4883733084269 | 5.239380262858 | 1.61116742820521e- | 6.3595811130393e- |           | neurobeachin [Source:HGNC                 |
| 72             | 2               | 07              | 09             | 07                 | 05                | NBEA      | Symbol;Acc:HGNC:7648]                     |
| 36.11155421517 | 2.8046968920554 | 0.5186800567250 | 4.737562152321 | 2.1630452834815e-  | 0.000518520531100 |           | ankyrin repeat domain 29 [Source:HGNC     |
| 13             | 3               | 92              | 81             | 06                 | 909               | ANKRD29   | Symbol;Acc:HGNC:27110]                    |
| 12.04019558140 | 2.7990718134608 | 0.7295153800192 | 3.404367638545 | 0.000663174316059  | 0.046863513908705 |           | syntrophin gamma 1 [Source:HGNC           |
| 36             | 4               | 08              | 68             | 822                | 6                 | SNTG1     | Symbol;Acc:HGNC:13740]                    |
| 38.52802974466 | 2.7972267306245 | 0.7255527369560 | 4.876592805072 | 1.07933919362084e- | 0.000292295757822 |           | ameloblastin [Source:HGNC                 |
| 75             | 1               | 86              | 27             | 06                 | 874               | AMBN      | Symbol;Acc:HGNC:452]                      |
| 194.8478494166 | 2.7878481529971 | 0.6431185664330 | 4.114998337375 | 3.87182205556909e- | 0.005426128201004 |           | stonin 2 [Source:HGNC                     |
| 44             | 5               | 24              | 12             | 05                 | 79                | STON2     | Symbol;Acc:HGNC:30652]                    |
| 21.01741742943 |                 | 0.7381610683448 | 3.594181693417 | 0.000325412701256  | 0.028209321150229 |           | potassium voltage-gated channel           |
| 5              | 2.776497140732  | 11              | 91             | 915                | 1                 | KCNC3     | subfamily C member 3 [Source:HGNC         |
| 443.9180536048 | 2.7577379928718 | 0.6785399636057 | 3.876176173331 | 0.000106110868339  | 0.012243101879425 |           | Symbol;Acc:HGNC:6235]                     |
| 96             | 6               | 28              | 16             | 747                | 4                 | IL2RA     | interleukin 2 receptor subunit alpha      |
| 41.71308996427 |                 | 0.7585461814528 | 3.562187400361 | 0.000367777699163  | 0.030900870887661 |           | [Source:HGNC Symbol;Acc:HGNC:6008]        |
| 58             | 2.7510031337018 | 57              | 46             | 449                | 3                 | PARD3B    | par-3 family cell polarity regulator beta |
| 683.4423819981 | 2.7444584080202 | 0.7037112578466 | 3.766453070088 | 0.000165583191394  |                   |           | [Source:HGNC Symbol;Acc:HGNC:14446]       |
| 16             | 9               | 14              | 53             | 446                |                   | RFX8      | RFX family member 8, lacking RFX DNA      |
| 734.0319554895 | 2.7242781421194 | 0.7819739282884 | 4.477474012204 | 7.55314186714542e- | 0.016902897244901 |           | binding domain [Source:HGNC               |
| 96             | 3               | 75              | 34             | 06                 | 0.001455890310015 |           | Symbol;Acc:HGNC:37253]                    |
| 399.3791506120 | 2.7211786974374 | 0.6549112129762 | 4.142873583928 | 3.42981024346983e- | 0.001455890310015 |           | sorting nexin 7 [Source:HGNC              |
| 9              | 5               | 23              | 42             | 05                 | 42                | SNX7      | Symbol;Acc:HGNC:14971]                    |
| 12.54364641878 | 2.7078770957615 | 0.7755979528445 | 3.812392633984 | 0.004886435741653  |                   |           | sarcoglycan epsilon [Source:HGNC          |
| 55             | 2               | 5               | 24             | 699                | 02                | SGCE      | Symbol;Acc:HGNC:10808]                    |
| 32.88107367621 | 2.7043329544467 | 0.6327513027363 | 3.983578479105 | 6.78852392300044e- | 0.014701972238006 |           | solute carrier family 10 member 2         |
| 02             | 6               | 37              | 15             | 05                 | 7                 | SLC10A2   | [Source:HGNC Symbol;Acc:HGNC:10906]       |
| 406.0198829629 | 2.7008406059327 | 0.5908121704417 | 4.356721286959 | 1.32025209248818e- | 0.008588662235864 |           | carbonic anhydrase 7 [Source:HGNC         |
| 94             | 4               | 38              | 52             | 05                 | 03                | CA7       | Symbol;Acc:HGNC:1381]                     |
| 18.84350413153 | 2.7006690551675 | 0.7624758364890 | 3.954581847961 | 7.66686227882474e- | 0.002276948450876 |           | chromosome 14 open reading frame 132      |
| 9              | 9               | 73              | 04             | 05                 | 45                | C14orf132 | [Source:HGNC Symbol;Acc:HGNC:20346]       |
| 252.5282013498 | 2.6976539428667 | 0.6289823567362 | 3.968098646779 | 7.24483458093936e- | 0.009236314086490 |           | family with sequence similarity 47 member |
| 16             | 6               | 62              | 21             | 05                 | 04                | FAM47A    | A [Source:HGNC Symbol;Acc:HGNC:29962]     |
| 4.976343805682 | 2.6963437135823 | 0.7580226293011 | 3.701660705016 | 0.000214192923903  | 0.008891338559858 |           | dual specificity phosphatase 26           |
| 22             | 3               | 6               | 12             | 905                | 46                | DUSP26    | [Source:HGNC Symbol;Acc:HGNC:28161]       |
| 66.81705206169 | 2.6907490709702 | 0.7063781535568 | 3.459709235517 | 0.000540758967361  | 0.020704052302310 |           | proline rich 16 [Source:HGNC              |
| 41             | 1               | 31              | 88             | 242                | 2                 | PRR16     | Symbol;Acc:HGNC:29654]                    |
|                |                 |                 |                |                    |                   |           | KIAA1217 [Source:HGNC                     |
|                |                 |                 |                |                    |                   |           | Symbol;Acc:HGNC:25428]                    |

|                  |                   |                   |                  |                      |                      |          |                                                                                                |
|------------------|-------------------|-------------------|------------------|----------------------|----------------------|----------|------------------------------------------------------------------------------------------------|
| 1532.03499372606 | 2.69060922892463  | 0.462398532997771 | 5.2112657541176  | 1.87556552684645e-07 | 7.23041543337698e-05 | CRADD    | CASP2 and RIPK1 domain containing adaptor with death domain [Source:HGNC Symbol;Acc:HGNC:2340] |
| 4584.56696287787 | 2.68676174450211  | 0.67566053059238  | 4.16409931813552 | 3.12584035811168e-05 | 0.00455233497131572  | ENAM     | enamelin [Source:HGNC Symbol;Acc:HGNC:3344]                                                    |
| 859.227489824327 | 2.68441730582714  | 0.779536723010419 | 5.98145512523522 | 2.21152988616094e-09 | 1.76749783682248e-06 | GPC6     | glypican 6 [Source:HGNC Symbol;Acc:HGNC:4454]                                                  |
| 151.406217539905 | 2.68436647070222  | 0.773017332403026 | 5.5559916675342  | 2.76040039921301e-08 | 1.43575873462558e-05 | CHRNA1   | cholinergic receptor nicotinic alpha 1 subunit [Source:HGNC Symbol;Acc:HGNC:1955]              |
| 247.413654611569 | 2.68081843926683  | 0.533510139748009 | 4.5780464276998  | 4.69338538391662e-06 | 0.000955235107206086 | ROBO3    | roundabout guidance receptor 3 [Source:HGNC Symbol;Acc:HGNC:13433]                             |
| 163.756088853536 | 2.68009657621128  | 0.632279491138271 | 4.08099698656162 | 4.484293653687e-05   | 0.00614817298928936  | WWTR1    | WW domain containing transcription regulator 1 [Source:HGNC Symbol;Acc:HGNC:24042]             |
| 111.201373054051 | 2.673543027424134 | 0.602510331068634 | 3.97952171147999 | 6.90540537864983e-05 | 0.00866473562616089  | ROBO4    | roundabout guidance receptor 4 [Source:HGNC Symbol;Acc:HGNC:17985]                             |
| 8.38561744169742 | 2.66136029333765  | 0.773568811313063 | 3.54397350483578 | 0.000394144852433217 | 0.0321445165382294   | ARHGEF15 | Rho guanine nucleotide exchange factor 15 [Source:HGNC Symbol;Acc:HGNC:15590]                  |
| 183.567756167135 | 2.65005777649225  | 0.650442264595859 | 3.72406315849818 | 0.000196041847159414 | 0.0191187477610705   | TBC1D8B  | TBC1 domain family member 8B [Source:HGNC Symbol;Acc:HGNC:24715]                               |
| 18.3454785717325 | 2.64937097374683  | 0.750637103259968 | 3.4980231519214  | 0.000468720441941646 | 0.0364822599561612   | TRAPPC3L | trafficking protein particle complex 3 like [Source:HGNC Symbol;Acc:HGNC:21090]                |
| 103.284373219429 | 2.64149912941644  | 0.677047975736993 | 3.7397677930434  | 0.000184190327854238 | 0.0181793634431556   | PEAR1    | platelet endothelial aggregation receptor 1 [Source:HGNC Symbol;Acc:HGNC:33631]                |
| 217.424763158659 | 2.62698133342708  | 0.710816205587112 | 3.42772534455085 | 0.000608660913751104 | 0.0440829795566360   | ARHGAP29 | Rho GTPase activating protein 29 [Source:HGNC Symbol;Acc:HGNC:30207]                           |
| 6.44641970627799 | 2.61184088068919  | 0.781689956331147 | 3.43917601666477 | 0.000583487724588816 | 0.0426779592842105   | CLEC4M   | C-type lectin domain family 4 member M [Source:HGNC Symbol;Acc:HGNC:13523]                     |
| 258.673298012874 | 2.55365690249442  | 0.664085935156196 | 3.48139039303768 | 0.000498817886488852 | 0.0382793079729899   | EPB41L3  | erythrocyte membrane protein band 4.1 like 3 [Source:HGNC Symbol;Acc:HGNC:3380]                |
| 122.319988494765 | 2.54950305849414  | 0.670921397291216 | 3.73036580636397 | 0.000191201960965892 | 0.0187584007692526   | CA6      | carbonic anhydrase 6 [Source:HGNC Symbol;Acc:HGNC:1380]                                        |
| 6.09944956222507 | 2.54546195882413  | 0.74045486444531  | 3.52963019759805 | 0.000416140890534201 | 0.0333401092934589   | LINGO4   | leucine rich repeat and Ig domain containing 4 [Source:HGNC Symbol;Acc:HGNC:31814]             |
| 15.2687063817246 | 2.53974958471106  | 0.752413236228732 | 3.4706913277491  | 0.000519120368313957 | 0.0392853030690803   | NES      | nestin [Source:HGNC Symbol;Acc:HGNC:7756]                                                      |

|                |                 |                 |                |                   |                   |         |                                                                                                                      |
|----------------|-----------------|-----------------|----------------|-------------------|-------------------|---------|----------------------------------------------------------------------------------------------------------------------|
| 24.86729647676 | 2.5319364378830 | 0.7808355036970 | 3.460521080177 | 0.000539131020686 | 0.040242016596476 |         | calcium voltage-gated channel auxiliary subunit gamma 8 [Source:HGNC Symbol;Acc:HGNC:13628]                          |
| 29             | 1               | 03              | 62             | 432               | 1                 | CACNG8  |                                                                                                                      |
| 175.2803171686 | 2.5305254257739 | 0.7043293969730 | 3.538677669979 | 0.000402136561120 | 0.032458761407578 |         | microtubule associated scaffold protein 1 [Source:HGNC Symbol;Acc:HGNC:29789]                                        |
| 86             | 8               | 56              | 89             | 617               | 1                 | MTUS1   |                                                                                                                      |
| 474.9021294168 | 2.5090835966213 | 0.6521775814909 | 3.871775898702 | 0.000108045267986 | 0.012422552074986 |         | ring finger protein 157 [Source:HGNC Symbol;Acc:HGNC:29402]                                                          |
| 53             | 7               | 27              | 11             | 183               | 8                 | RNF157  |                                                                                                                      |
| 27.29567198926 | 2.5008069018725 | 0.6834616358619 | 3.602512475619 | 0.000315156269881 | 0.027538775070616 |         | stress associated endoplasmic reticulum protein family member 2 [Source:HGNC Symbol;Acc:HGNC:20607]                  |
| 89             | 6               | 27              | 62             | 624               | 2                 | SERP2   |                                                                                                                      |
| 191.4594841308 | 2.4981281954025 | 0.6691293673162 | 3.583659785733 | 0.000338813337959 | 0.029153065039232 |         | fermitin family member 1 [Source:HGNC Symbol;Acc:HGNC:15889]                                                         |
| 85             | 6               | 66              | 55             | 829               | 3                 | FERMT1  |                                                                                                                      |
| 8.581247306950 | 2.4968980286803 | 0.7631514279649 | 3.617629729381 | 0.000297313318659 | 0.026259738074983 |         | activity regulated cytoskeleton associated protein [Source:HGNC Symbol;Acc:HGNC:648]                                 |
| 63             | 2               | 86              | 08             | 022               | 4                 | ARC     |                                                                                                                      |
| 16249.82102481 | 2.4911663540653 | 0.6769649644172 | 3.817594434398 | 0.000134759212297 | 0.014573563922619 |         | joining chain of multimeric IgA and IgM [Source:HGNC Symbol;Acc:HGNC:5713]                                           |
| 4              | 8               | 46              | 85             | 17                | 3                 | JCHAIN  |                                                                                                                      |
| 7.929012012376 | 2.4902616960279 | 0.6107261183327 | 3.543358492348 | 0.000395065265289 | 0.032144516538229 |         | cilia and flagella associated protein 69 [Source:HGNC Symbol;Acc:HGNC:26107]                                         |
| 55             | 8               | 7               | 15             | 66                | 4                 | CFAP69  |                                                                                                                      |
| 13.65526511025 | 2.4891062754674 | 0.5076837735115 | 4.216153335559 | 2.4850482183314e- | 0.003769910186031 |         | vitelline membrane outer layer 1 homolog [Source:HGNC Symbol;Acc:HGNC:30387]                                         |
| 44             | 6               | 52              | 79             | 05                | 64                | VMO1    |                                                                                                                      |
| 67.94550859462 | 2.4665453258756 | 0.6618754613272 | 3.499664657739 | 0.000465843796449 | 0.036344689338241 |         | coiled-coil domain containing 149 [Source:HGNC Symbol;Acc:HGNC:25405]                                                |
| 31             | 7               | 64              | 39             | 626               | 3                 | CCDC149 |                                                                                                                      |
| 545.1174785451 | 2.4496099970234 |                 | 3.479738444469 | 0.000501903518168 | 0.038425424027755 |         | StAR related lipid transfer domain containing 13 [Source:HGNC Symbol;Acc:HGNC:19164]                                 |
| 58             | 2               | 0.669958379109  | 83             | 843               | 4                 | STARD13 |                                                                                                                      |
| 30.42568905381 | 2.4434190823680 | 0.6729082337679 | 3.448779527068 | 0.000563126284618 | 0.041653548745791 |         | diacylglycerol kinase iota [Source:HGNC Symbol;Acc:HGNC:2855]                                                        |
| 68             | 5               | 32              | 76             | 699               | 2                 | DGKI    |                                                                                                                      |
| 1049.682827965 |                 | 0.6814842121734 | 3.594468060487 | 0.000325055016241 | 0.028209321150229 |         | ninein like [Source:HGNC Symbol;Acc:HGNC:29163]                                                                      |
| 95             | 2.442791850222  | 72              | 64             | 101               | 1                 | NINL    |                                                                                                                      |
| 21.96480171845 | 2.4325813392464 | 0.7208748169560 | 3.497220367667 | 0.000470133301864 | 0.036505516671818 |         | glutamate ionotropic receptor NMDA type subunit 2A [Source:HGNC Symbol;Acc:HGNC:4585]                                |
| 18             | 1               | 26              | 5              | 85                | 5                 | GRIN2A  |                                                                                                                      |
| 6.819203713909 | 2.4235117510578 | 0.7800491416583 | 3.502873527547 | 0.000460267945637 | 0.035995370030183 |         | glycosylphosphatidylinositol anchored high density lipoprotein binding protein 1 [Source:HGNC Symbol;Acc:HGNC:24945] |
| 37             | 6               | 81              | 74             | 417               | 5                 | GPIHBP1 |                                                                                                                      |
| 39.15204179665 | 2.4077687365361 | 0.7820176511319 | 4.480254858899 | 7.4553963361866e- | 0.001445552823338 |         | RAS like estrogen regulated growth inhibitor [Source:HGNC Symbol;Acc:HGNC:15980]                                     |
| 74             | 1               | 73              | 67             | 06                | 24                | RERG    |                                                                                                                      |
| 29.62818818156 | 2.3944926197537 | 0.6805932720943 | 3.504139128567 | 0.000458085963922 | 0.035987686272334 |         | basic helix-loop-helix family member a15 [Source:HGNC Symbol;Acc:HGNC:22265]                                         |
| 83             | 1               | 04              | 92             | 21                | 4                 | BHLHA15 |                                                                                                                      |

|                      |                      |                       |                      |                          |                          |         |                                                                                                        |
|----------------------|----------------------|-----------------------|----------------------|--------------------------|--------------------------|---------|--------------------------------------------------------------------------------------------------------|
| 118.7735861514<br>17 | 2.3664290391406<br>2 | 0.4309328064781<br>97 | 4.782891652963<br>49 | 1.72791273514593e-<br>06 | 0.000425716124099<br>713 | GK3P    | glycerol kinase 3 pseudogene<br>[Source:HGNC Symbol;Acc:HGNC:4292]                                     |
| 105.0057306856<br>71 | 2.3438352457764<br>7 | 0.5132648852535<br>57 | 4.004655554361<br>49 | 6.21079112794764e-<br>05 | 0.008012409593723<br>94  | PIK3R6  | phosphoinositide-3-kinase regulatory<br>subunit 6 [Source:HGNC<br>Symbol;Acc:HGNC:27101]               |
| 104.0624264620<br>53 | 2.3309690294819<br>2 | 0.5523120859287<br>29 | 3.685367484031<br>97 | 0.000228372883962<br>694 | 0.021690790323737<br>9   | SLC6A20 | solute carrier family 6 member 20<br>[Source:HGNC Symbol;Acc:HGNC:30927]                               |
| 30.05205452719<br>72 | 2.3196344894334<br>8 | 0.5179322809341<br>64 | 3.845745067363<br>88 | 0.000120186672471<br>309 | 0.013486176796629<br>6   | GPR162  | G protein-coupled receptor 162<br>[Source:HGNC Symbol;Acc:HGNC:16693]                                  |
| 336.6849523514<br>62 | 2.3195717357142<br>2 | 0.5465189899396<br>7  | 3.840061441974<br>05 | 0.000123003521930<br>126 | 0.013662981039343<br>6   | EMILIN1 | elastin microfibril interfacier 1<br>[Source:HGNC Symbol;Acc:HGNC:19880]                               |
| 191.7347033704<br>37 | 2.3069100472265<br>3 | 0.5042642612855<br>66 | 4.049244815243<br>65 | 5.13831717963201e-<br>05 | 0.006928904417373<br>73  | SPTLC3  | serine palmitoyltransferase long chain<br>base subunit 3 [Source:HGNC<br>Symbol;Acc:HGNC:16253]        |
| 1962.803486532<br>93 | 2.2918686058479<br>8 | 0.5830189402988<br>88 | 3.436693792134<br>38 | 0.000588860924655<br>939 | 0.042975044051505<br>2   | GPRIN3  | GPRIN family member 3 [Source:HGNC<br>Symbol;Acc:HGNC:27733]                                           |
| 57.85329728676<br>6  | 2.2686023516109<br>9 | 0.7811123524269<br>49 | 4.417644616821<br>92 | 9.97823065816696e-<br>06 | 0.001816481456704<br>53  | HS3ST4  | heparan sulfate-glucosamine 3-<br>sulfotransferase 4 [Source:HGNC<br>Symbol;Acc:HGNC:5200]             |
| 236.0480835415<br>65 | 2.266361835535<br>67 | 0.4365989619860<br>67 | 4.510780426048<br>87 | 6.4589552220667e-<br>06  | 0.001267347573153<br>78  | CARMIL1 | capping protein regulator and myosin 1<br>linker 1 [Source:HGNC<br>Symbol;Acc:HGNC:21581]              |
| 1858.282256064<br>03 | 2.2640842983045<br>4 | 0.4006892902489<br>13 | 4.864690715160<br>21 | 1.14635923862245e-<br>06 | 0.000304932731370<br>36  | PSTPIP2 | proline-serine-threonine phosphatase<br>interacting protein 2 [Source:HGNC<br>Symbol;Acc:HGNC:9581]    |
| 249.4741440777<br>24 | 2.2515498970927<br>3 | 0.6364080397575<br>04 | 3.399704326252<br>48 | 0.000674587567446<br>982 | 0.047450851995674<br>6   | MMP14   | matrix metalloproteinase 14 [Source:HGNC<br>Symbol;Acc:HGNC:7160]                                      |
| 819.9647446502<br>66 | 2.2115932849593<br>3 | 0.5301834537398<br>6  | 3.619034073172<br>83 | 0.000295704705867<br>108 | 0.026259218975212<br>5   | COLQ    | collagen like tail subunit of asymmetric<br>acetylcholinesterase [Source:HGNC<br>Symbol;Acc:HGNC:2226] |
| 496.9959871719<br>27 | 2.1728686841853<br>8 | 0.7099703391429<br>54 | 3.560471237996<br>58 | 0.000370189859412<br>833 | 0.031023993128490<br>3   | CR2     | complement C3d receptor 2 [Source:HGNC<br>Symbol;Acc:HGNC:2336]                                        |
| 302.7302330826<br>03 | 2.1642916402865<br>1 | 0.5343465223756<br>69 | 3.625457076788<br>5  | 0.000288450806851<br>407 | 0.025895769969608<br>6   | SLC1A3  | solute carrier family 1 member 3<br>[Source:HGNC Symbol;Acc:HGNC:10941]                                |
| 1627.738514407<br>1  | 2.1558712851337<br>5 | 0.3678656446367<br>24 | 5.064582766323<br>18 | 4.09295786028616e-<br>07 | 0.000131488277613<br>585 | S100A13 | S100 calcium binding protein A13<br>[Source:HGNC Symbol;Acc:HGNC:10490]                                |
| 64.96916741529<br>33 | 2.1541160472845<br>8 | 0.5715776628379<br>5  | 3.411456688071<br>71 | 0.000646167660554<br>362 | 0.045830350435163<br>1   | RASIP1  | Ras interacting protein 1 [Source:HGNC<br>Symbol;Acc:HGNC:24716]                                       |
| 76.69465994652<br>13 | 2.0950149703902<br>1 | 0.5006403888396<br>19 | 3.543180488354<br>75 | 0.000395332036282<br>546 | 0.032144516538229<br>4   | MAFB    | MAF bZIP transcription factor B<br>[Source:HGNC Symbol;Acc:HGNC:6408]                                  |
| 165.2266623384<br>07 | 2.0746344134770<br>6 | 0.7814783442615<br>67 | 4.153589382785<br>26 | 3.27300279361382e-<br>05 | 0.004703936646541<br>13  | NTRK2   | neurotrophic receptor tyrosine kinase 2<br>[Source:HGNC Symbol;Acc:HGNC:8032]                          |

|                      |                       |                       |                      |                          |                          |          |                                                                                                                                               |
|----------------------|-----------------------|-----------------------|----------------------|--------------------------|--------------------------|----------|-----------------------------------------------------------------------------------------------------------------------------------------------|
| 200.7318955764<br>69 | 2.0625427437444<br>2  | 0.4757307468718<br>66 | 3.667079397548<br>07 | 0.000245336634710<br>952 | 0.022838610358546<br>8   | KIAA1671 | KIAA1671 [Source:HGNC<br>Symbol;Acc:HGNC:29345]<br>SLP adaptor and CSK interacting<br>membrane protein [Source:HGNC<br>Symbol;Acc:HGNC:33504] |
| 305.1568093458<br>96 | 2.0399073843018<br>4  | 0.4043147849245<br>7  | 4.307403401128<br>14 | 1.65182195283536e-<br>05 | 0.002666349839926<br>56  | SCIMP    | GRB2 associated binding protein 1<br>[Source:HGNC Symbol;Acc:HGNC:4066]                                                                       |
| 16297.30155661<br>73 | 2.0200373180601<br>9  | 0.2291246215917<br>9  | 7.460800127182<br>39 | 8.59986238394521e-<br>14 | 2.32315030034778e-<br>10 | GAB1     | endonuclease, poly(U) specific<br>[Source:HGNC Symbol;Acc:HGNC:14369]                                                                         |
| 30.44309704864<br>46 | 1.9962326068638<br>1  | 0.3333402333490<br>89 | 5.042048984382<br>15 | 4.6057334370879e-<br>07  | 0.000142559113632<br>942 | ENDOU    | Rho GTPase activating protein 31<br>[Source:HGNC Symbol;Acc:HGNC:29216]                                                                       |
| 219.2558211049<br>61 | 1.9742845103014<br>7  | 0.4533501784382<br>14 | 3.741999692251<br>84 | 0.000182561738975<br>399 | 0.018073060612525<br>3   | ARHGAP31 | CNKSR family member 3 [Source:HGNC<br>Symbol;Acc:HGNC:23034]                                                                                  |
| 1023.440953840<br>31 | 1.9742657372116<br>7  | 0.4788464815098<br>57 | 3.574617109289<br>02 | 0.000350740798481<br>165 | 0.030024965229345<br>6   | CNKSR3   | neurexophilin 3 [Source:HGNC<br>Symbol;Acc:HGNC:8077]                                                                                         |
| 58.78371421108<br>03 | 1.9726627413657<br>7  | 0.4884717897534<br>87 | 3.458426081359<br>67 | 0.000543341347165<br>856 | 0.040372356607552<br>8   | NXPH3    | zinc finger DHHC-type containing 15<br>[Source:HGNC Symbol;Acc:HGNC:20342]                                                                    |
| 124.6618199193<br>39 | 1.9608642417804<br>8  | 0.3373807901266<br>52 | 4.914960095411<br>26 | 8.88005450538383e-<br>07 | 0.000246594598332<br>557 | ZDHHC15  | CD27 molecule [Source:HGNC<br>Symbol;Acc:HGNC:11922]                                                                                          |
| 446.3799819792<br>01 | 1.9344423942271<br>7  | 0.4708788893369<br>22 | 3.506828151896<br>55 | 0.000453481908151<br>943 | 0.035892983493533<br>5   | CD27     | growth arrest specific 6 [Source:HGNC<br>Symbol;Acc:HGNC:4168]                                                                                |
| 257.1386271377<br>82 | 1.9299625766349<br>2  | 0.4680216157528<br>27 | 3.536893255348<br>2  | 0.000404863263305<br>981 | 0.032595969071278<br>6   | GAS6     | CUE domain containing 1 [Source:HGNC<br>Symbol;Acc:HGNC:31350]                                                                                |
| 219.6661246127<br>3  | 1.8998805831546<br>66 | 0.4667703400116<br>66 | 3.476350400788<br>47 | 0.000508287713141<br>673 | 0.038733887870293<br>8   | CUEDC1   | MTSS1, I-BAR domain containing<br>[Source:HGNC Symbol;Acc:HGNC:20443]                                                                         |
| 1137.256620042<br>18 | 1.8990920127238<br>96 | 0.4494851177239<br>96 | 3.545268376043<br>05 | 0.000392213525754<br>804 | 0.032144516538229<br>4   | MTSS1    | interleukin 21 receptor [Source:HGNC<br>Symbol;Acc:HGNC:6006]                                                                                 |
| 561.9014578607<br>64 | 1.8981196022129<br>3  | 0.4322361285085<br>89 | 3.762603369467<br>12 | 0.000168153770189<br>882 | 0.016974477802959<br>8   | IL21R    | coiled-coil domain containing 152<br>[Source:HGNC Symbol;Acc:HGNC:34438]                                                                      |
| 707.8743219971<br>8  | 1.8929055961895<br>4  | 0.3208332723747<br>09 | 4.991314781720<br>3  | 5.99696719815814e-<br>07 | 0.000178644201044<br>769 | CCDC152  | RAS and EF-hand domain containing<br>[Source:HGNC Symbol;Acc:HGNC:26464]                                                                      |
| 321.1455307852<br>77 | 1.8888645046929<br>3  | 0.7796147786001<br>22 | 4.315957154177<br>09 | 1.58912803305061e-<br>05 | 0.002603627369350<br>12  | RASEF    | sperm acrosome associated 6<br>[Source:HGNC Symbol;Acc:HGNC:27113]                                                                            |
| 27.01005566869<br>05 | 1.8290482238820<br>2  | 0.4116792230465<br>43 | 3.710720968166<br>22 | 0.000206669808059<br>907 | 0.020095419200317<br>6   | SPACA6   | CTD small phosphatase like [Source:HGNC<br>Symbol;Acc:HGNC:16890]                                                                             |
| 1151.931471484<br>35 | 1.8239544909976<br>1  | 0.3524994485560<br>3  | 4.303786147842<br>06 | 1.67903742034009e-<br>05 | 0.002683838936083<br>13  | CTDSPL   | chromosome 15 open reading frame 52<br>[Source:HGNC Symbol;Acc:HGNC:33488]                                                                    |
| 313.0082745730<br>79 | 1.8158584743402<br>2  | 0.3981731174505<br>76 | 3.796352664265<br>06 | 0.000146840566799<br>548 | 0.015323795200278<br>9   | C15orf52 | chromosome 3 open reading frame 52<br>[Source:HGNC Symbol;Acc:HGNC:26255]                                                                     |
| 649.1104516363<br>33 | 1.7932019006308<br>8  | 0.3041640394422<br>51 | 4.918923183309<br>01 | 8.70216094138013e-<br>07 | 0.000243720008313<br>798 | C3orf52  | dynein axonemal heavy chain 7<br>[Source:HGNC Symbol;Acc:HGNC:18661]                                                                          |
| 158.9643770449<br>11 | 1.7803031401872<br>5  | 0.3647175161356<br>08 | 4.040911138198<br>94 | 5.32439322373113e-<br>05 | 0.007121212945111<br>09  | DNAH7    |                                                                                                                                               |

|                      |                       |                       |                      |                          |                          |                |                                                                                                          |
|----------------------|-----------------------|-----------------------|----------------------|--------------------------|--------------------------|----------------|----------------------------------------------------------------------------------------------------------|
| 1843.021162847<br>77 | 1.7690831435764       | 0.3859625224777<br>95 | 3.797291298872<br>52 | 0.000146285847558<br>917 | 0.015314679401950<br>8   | PHACTR1        | phosphatase and actin regulator 1<br>[Source:HGNC Symbol;Acc:HGNC:20990]                                 |
| 1156.995508947<br>49 | 1.7398174847424<br>8  | 0.2771876851489<br>76 | 5.156899476858<br>24 | 2.51072501969559e-<br>07 | 9.141270827265e-05       | ST3GAL5        | ST3 beta-galactoside alpha-2,3-<br>sialyltransferase 5 [Source:HGNC<br>Symbol;Acc:HGNC:10872]            |
| 7350.999879265<br>77 | 1.7110075253005<br>5  | 0.3167298114637<br>11 | 4.438711295234<br>26 | 9.04991126288331e-<br>06 | 0.001675409560803<br>17  | NUDT4          | nudix hydrolase 4 [Source:HGNC<br>Symbol;Acc:HGNC:8051]                                                  |
| 783.5005251926<br>29 | 1.6640187701677<br>2  | 0.3838273252291<br>59 | 3.566214394041<br>72 | 0.000362175115112<br>094 | 0.030586995288642        | SNX8           | sorting nexin 8 [Source:HGNC<br>Symbol;Acc:HGNC:14972]                                                   |
| 5853.385454566<br>66 | 1.6181536638808<br>9  | 0.3691483544138<br>53 | 3.563295828808<br>39 | 0.000366227561383<br>415 | 0.030849729386662<br>6   | TMEM2          | transmembrane protein 2 [Source:HGNC<br>Symbol;Acc:HGNC:11869]                                           |
| 270.5475957589<br>21 | 1.4375374456060<br>9  | 0.3091788751557<br>29 | 3.641520134509<br>75 | 0.000271032923336<br>671 | 0.024756131203636<br>4   | AC072022.<br>1 |                                                                                                          |
| 147.9659025176<br>91 | 1.4126450241172<br>5  | 0.2987781682297<br>51 | 3.670562926672<br>3  | 0.000242016877128<br>835 | 0.022722078200128<br>2   | VASH1          | vasohibin 1 [Source:HGNC<br>Symbol;Acc:HGNC:19964]                                                       |
| 8316.858275298<br>01 | 1.3148447859675<br>2  | 0.2809517652419<br>93 | 3.573950520552<br>72 | 0.000351635405930<br>571 | 0.030024965229345<br>6   | EDEM1          | ER degradation enhancing alpha-<br>mannosidase like protein 1 [Source:HGNC<br>Symbol;Acc:HGNC:18967]     |
| 313.4827932347<br>66 | 1.2673279752612<br>56 | 0.2330571415175<br>56 | 4.091251058622<br>86 | 4.29052343540001e-<br>05 | 0.005932146494986<br>82  | SELENON        | selenoprotein N [Source:HGNC<br>Symbol;Acc:HGNC:15999]                                                   |
| 6401.946901321<br>81 | 1.2666502912575<br>6  | 0.2403449757992<br>7  | 3.972898680019<br>34 | 7.10032564997581e-<br>05 | 0.008811338405162<br>51  | LPP            | LIM domain containing preferred<br>translocation partner in lipoma<br>[Source:HGNC Symbol;Acc:HGNC:6679] |
| 247.8839290936<br>82 | 1.2512200130130<br>3  | 0.2692504948234<br>12 | 3.490445959189<br>51 | 0.000482215127651<br>669 | 0.037179353653858<br>5   | ECT2L          | epithelial cell transforming 2 like<br>[Source:HGNC Symbol;Acc:HGNC:21118]                               |
| 550.6756975436<br>34 | 0.8465146475829<br>26 | 0.1403938657293<br>15 | 3.761533933882<br>42 | 0.000168874504509<br>427 | 0.016974477802959<br>8   | RNF44          | ring finger protein 44 [Source:HGNC<br>Symbol;Acc:HGNC:19180]                                            |
| 149.7525682550<br>19 | 4.3483587370508<br>6  | 0.7067611275352<br>14 | 5.615456230393<br>48 | 1.96044279434886e-<br>08 | 1.05311130303645e-<br>05 | ROBO1          | roundabout guidance receptor 1<br>[Source:HGNC Symbol;Acc:HGNC:10249]                                    |
| 304.6899987789<br>47 | 3.9821295413213<br>8  | 0.7472095245261<br>48 | 4.820284827425<br>65 | 1.43353401456678e-<br>06 | 0.000364019757680<br>77  | LAMP5          | lysosomal associated membrane protein<br>family member 5 [Source:HGNC<br>Symbol;Acc:HGNC:16097]          |
| 547.5538599574<br>81 | 3.8346937852654<br>9  | 0.6635426713807<br>16 | 5.299769555540<br>61 | 1.15948934064602e-<br>07 | 4.74926833928609e-<br>05 | PTPRK          | protein tyrosine phosphatase, receptor<br>type K [Source:HGNC<br>Symbol;Acc:HGNC:9674]                   |
| 67.17409714546<br>6  | 3.8021743164543<br>8  | 0.6944265681452<br>6  | 5.042486855565<br>12 | 4.59520330267986e-<br>07 | 0.000142559113632<br>942 | ZNF99          | zinc finger protein 99 [Source:HGNC<br>Symbol;Acc:HGNC:13175]                                            |
| 151.6489517980<br>74 | 3.6243402791873<br>1  | 0.7824002686850<br>35 | 4.459975337243<br>06 | 8.1969084839766e-<br>06  | 0.001552579752618<br>18  | GOLGA8S        | golgin A8 family member S [Source:HGNC<br>Symbol;Acc:HGNC:44409]                                         |

|                  |                      |                      |                     |                      |                      |          |                                                                                                       |
|------------------|----------------------|----------------------|---------------------|----------------------|----------------------|----------|-------------------------------------------------------------------------------------------------------|
| 59.3753489309547 | -<br>3.5002738040948 | -<br>0.6722275914071 | -<br>4.721450190481 | 2.34168981523995e-06 | 0.000548336535405152 | KLHL13   | kelch like family member 13 [Source:HGNC Symbol;Acc:HGNC:22931]                                       |
| 74.6564470522216 | -<br>-3.324521196111 | 0.7508671139009      | 4.028495910705      | 5.61348370246452e-05 | 0.00735203164050137  | RASAL1   | RAS protein activator like 1 [Source:HGNC Symbol;Acc:HGNC:9873]                                       |
| 117.669695219274 | -<br>3.2228836390173 | 0.6432420226030      | 4.546757940009      | 5.44785929332256e-06 | 0.00108850886172923  | MECOM    | MDS1 and EVI1 complex locus [Source:HGNC Symbol;Acc:HGNC:3498]                                        |
| 69.2420297009199 | -<br>3.1033310950243 | 0.5559420586394      | 5.047115511424      | 4.48530195231204e-07 | 0.000142559113632942 | ATP1A3   | ATPase Na <sup>+</sup> /K <sup>+</sup> transporting subunit alpha 3 [Source:HGNC Symbol;Acc:HGNC:801] |
| 319.692031369761 | -<br>2.9534855964599 | 0.7703022155465      | 3.399615126733      | 0.000674807648620119 | 0.047450851995674    | NELL1    | neural EGFL like 1 [Source:HGNC Symbol;Acc:HGNC:7750]                                                 |
| 1937.07995196128 | -<br>2.9255640568929 | 0.6619267864346      | 3.981723971777      | 6.84172081212356e-05 | 0.00862267336814096  | IGLL1    | immunoglobulin lambda like polypeptide 1 [Source:HGNC Symbol;Acc:HGNC:5870]                           |
| 56.3744523335769 | -<br>2.8036206292230 | 0.6882700198015      | 3.664372821939      | 0.000247945402476926 | 0.0230160763409742   | PRR15    | proline rich 15 [Source:HGNC Symbol;Acc:HGNC:22310]                                                   |
| 18.6775183617935 | -<br>2.7979883070059 | 0.6914633111811      | 3.622281475930      | 0.000292016119035808 | 0.0260882253159006   | TMEM132B | transmembrane protein 132B [Source:HGNC Symbol;Acc:HGNC:29397]                                        |
| 23.6595776433393 | -<br>2.7786562852867 | 0.7230378164952      | 3.430918599551      | 0.000601541077853092 | 0.0437057606188251   | TFAP2A   | transcription factor AP-2 alpha [Source:HGNC Symbol;Acc:HGNC:11742]                                   |
| 233.409333649414 | -<br>2.7324576496748 | 0.5643450782431      | 4.341555429344      | 1.41477576017956e-05 | 0.00237740369792635  | TIFAB    | TIFA inhibitor [Source:HGNC Symbol;Acc:HGNC:34024]                                                    |
| 131.323937070538 | -<br>2.6736644434644 | 0.5683755843990      | 4.210951871793      | 2.54296923533296e-05 | 0.00384000073287514  | DCANP1   | dendritic cell associated nuclear protein [Source:HGNC Symbol;Acc:HGNC:24459]                         |
| 548.46099429275  | -<br>2.6660973838104 | 0.6100696020203      | -                   | 9.76690930977053e-05 | 0.0113893980164612   | PHLDB2   | pleckstrin homology like domain family B member 2 [Source:HGNC Symbol;Acc:HGNC:29573]                 |
| 16.8269369798557 | -<br>2.6282259498507 | 0.5712841896085      | 4.088917956420      | 4.33390093393699e-05 | 0.00596694394131291  | SLC26A7  | solute carrier family 26 member 7 [Source:HGNC Symbol;Acc:HGNC:14467]                                 |
| 11.5734690740221 | -<br>2.5920183809365 | 0.6147257448047      | 3.748459276946      | 0.000177924219371574 | 0.0177210359281694   | SLC29A4  | solute carrier family 29 member 4 [Source:HGNC Symbol;Acc:HGNC:23097]                                 |

|                  |                       |                        |                       |                           |                          |        |                                                                                            |
|------------------|-----------------------|------------------------|-----------------------|---------------------------|--------------------------|--------|--------------------------------------------------------------------------------------------|
| 299.124686787908 | -<br>2.45889610372007 | -<br>0.497708855426995 | -<br>4.34376691540477 | -<br>1.40060119126453e-05 | -<br>0.00236571648635856 | BAHCC1 | BAH domain and coiled-coil containing 1 [Source:HGNC Symbol;Acc:HGNC:29279]                |
| 62.7636675006276 | -<br>2.37301289293366 | -<br>0.598617941275282 | -<br>3.49367092716265 | -<br>0.000476427886392492 | -<br>0.0368197853332764  | SIT1   | signaling threshold regulating transmembrane adaptor 1 [Source:HGNC Symbol;Acc:HGNC:17710] |
| 136.023402103177 | -<br>2.29689023894542 | -<br>0.501088757545523 | -<br>3.99262561946512 | -<br>6.53456953099196e-05 | -<br>0.00833170328371769 | LTK    | leukocyte receptor tyrosine kinase [Source:HGNC Symbol;Acc:HGNC:6721]                      |
| 2115.35556049857 | -<br>2.27351507997327 | -<br>0.559260672178648 | -<br>3.54323488198471 | -<br>0.000395250499794322 | -<br>0.0321445165382294  | CD96   | CD96 molecule [Source:HGNC Symbol;Acc:HGNC:16892]                                          |
| 42.7658843828793 | -<br>2.22496693832719 | -<br>0.523206428076375 | -<br>3.68560520133124 | -<br>0.000228159809581045 | -<br>0.0216907903237379  | FBXO39 | F-box protein 39 [Source:HGNC Symbol;Acc:HGNC:28565]                                       |
| 250.226282169275 | -<br>2.09584815962747 | -<br>0.414329384591123 | -<br>4.3270148394239  | -<br>1.51143782450481e-05 | -<br>0.00248878364991827 | ZBTB46 | zinc finger and BTB domain containing 46 [Source:HGNC Symbol;Acc:HGNC:16094]               |
| 2052.02893697977 | -<br>1.7981119287927  | -<br>0.417755982942862 | -<br>3.58354029943246 | -<br>0.000338968438108749 | -<br>0.0291530650392323  | GPM6B  | glycoprotein M6B [Source:HGNC Symbol;Acc:HGNC:4461]                                        |
| 944.713614123541 | -<br>1.56163873573979 | -<br>0.363922992068653 | -<br>3.47911788968745 | -<br>0.000503067227414156 | -<br>0.0384254240277554  | PRDM15 | PR/SET domain 15 [Source:HGNC Symbol;Acc:HGNC:13999]                                       |
| 28.6893933622846 | -<br>1.51423521360164 | -<br>0.323197493742891 | -<br>3.75332967864688 | -<br>0.000174501112536121 | -<br>0.0174330867548281  | SAMD10 | sterile alpha motif domain containing 10 [Source:HGNC Symbol;Acc:HGNC:16129]               |
| 57.7626617805079 | -<br>1.17398222763552 | -<br>0.20130776276224  | -<br>4.26951921025729 | -<br>1.95894777760377e-05 | -<br>0.00307133018069475 | NR2F6  | nuclear receptor subfamily 2 group F member 6 [Source:HGNC Symbol;Acc:HGNC:7977]           |
| 2343.94728769998 | -<br>1.04000567344706 | -<br>0.189677916561471 | -<br>3.81088946325757 | -<br>0.000138467676003623 | -<br>0.0147019722380067  | CCSAP  | centriole, cilia and spindle associated protein [Source:HGNC Symbol;Acc:HGNC:29578]        |
| 3000.05230222647 | -<br>1.03724025981851 | -<br>0.209501293756832 | -<br>3.46356865844934 | -<br>0.000533060538102191 | -<br>0.0399710016305094  | MYC    | MYC proto-oncogene, bHLH transcription factor [Source:HGNC Symbol;Acc:HGNC:7553]           |

**Supplementary Table 6**  
**Enrichr, Chea 2016 database, only P.adj<0.05 included**

| Term                                             | Overlap  | P-value                   | Adjusted P-value          | Odds Ratio             | Genes                                                                                                                                                                                                                                                                                                                                                                                                                                                                                                                                                                                                                                                | Combined Score         |
|--------------------------------------------------|----------|---------------------------|---------------------------|------------------------|------------------------------------------------------------------------------------------------------------------------------------------------------------------------------------------------------------------------------------------------------------------------------------------------------------------------------------------------------------------------------------------------------------------------------------------------------------------------------------------------------------------------------------------------------------------------------------------------------------------------------------------------------|------------------------|
| SUZ12<br>20075857<br>ChIP-Seq<br>MESEs<br>Mouse  | 100/4356 | 3.732591488<br>321989E-12 | 2.407521509<br>9676828E-9 | 1.905132044<br>7020181 | RAB3B;TMEM200A;RASEF;KNDC1;ANTXR1;SYDE1;PEG10;CREB3L1;MYC;FAM19A1;BAHCC1;PRKCA;VASH1;NPNT;SHISA6;GPRIN3;GPR162;SCNN1A;PRR16;PRR15;LY6H;PHLDB2;DGKI;TSPYL5;KCNE3;NXPH3;LPL;TNFRSF11A;GRIN2A;STK33;SNTG1;EPB41L3;ST3GAL5;SNX7;SNX8;GPM6B;DRD5;FBXO39;ARHGAP29;INHBB;HSPA12B;NR2F6;TDRD1;FERMT1;MAFB;NBEA;PDE3A;SPATS2L;NES;ACVRL1;ROBO3;DAGLA;KCNC3;PEAR1;ELFN2;CHRDL1;RERG;RNF157;SERP2;GHR;SGCE;PCLO;MECOM;PSTPIP2;GRM8;PHACTR1;RNF150;DLGAP2;NINL;PTGIR;ARHGEF15;GAB1;CTDSPL;WNT9A;DUSP26;PARD3B;MMP14;RHOJ;SLC29A4;VWA2;GAS6;CUEDC1;LTK;ZBTB46;PON2;ATP1A3;KCNA5;THBS1;RASIP1;PRTG;GPC6;NTRK2;LINGO4;ECEL1;PLXDC2;POU4F1;NELL1;MYO1B;FRAS1;FAM171B | 50.131489<br>078879966 |
| ZNF217<br>24962896<br>ChIP-Seq<br>MCF-7<br>Human | 44/1522  | 4.617436286<br>168348E-8  | 1.489123202<br>2892922E-5 | 2.399114508<br>644991  | DAGLA;RASEF;PLOD2;PIK3C2G;STON2;PTPRK;KALRN;LPP;THBS1;RERG;ROBO1;MIPOL1;SERP2;MECOM;MYC;ENPP2;ST3GAL5;TMC1;TFAP2A;EPHA4;CD96;NTRK2;STARD13;MTUS1;CTDSPL;PRKCA;C14ORF132;VASH1;PLXDC2;MTSS1;PARD3B;KIAA1217;TSPAN15;TMMEM2;MYO1B;NR5A2;MAFB;FRAS1;NBEA;CNKSR3;PRR15;SPATS2L;CUEDC1;TSPYL5                                                                                                                                                                                                                                                                                                                                                             | 40.523061<br>96852831  |
| MTF2<br>20144788<br>ChIP-Seq<br>MESEs<br>Mouse   | 67/2981  | 1.611645490<br>5470783E-7 | 3.465037804<br>6762184E-5 | 1.865201601<br>8462714 | ACVRL1;RAB3B;DAGLA;RASEF;KNDC1;PEAR1;ELFN2;ANTXR1;RERG;NUDT4;GHR;GRM8;RNF150;DLGAP2;BAHCC1;EPHA4;ARHGEF15;MTUS1;GAB1;CTDSPL;PRKCA;WNT9A;VASH1;NPNT;DUSP26;PARD3B;MMP14;RHOJ;SCNN1A;PRR16;PRR15;VWA2;GAS6;LY6H;PHLDB2;CUEDC1;DGKI;CHRNA1;LTK;PON2;LPL;ATP1A3;TNFRSF11A;PRTG;GRIN2A;SNTG1;EPB41L3;ST3GAL5;SNX7;GPC6;GPM6B;DRD5;NTRK2;EDEM1;ECEL1;FBXO39;ARHGAP29;INHBB;POU4F1;TDRD1;FERMT1;NELL1;MAFB;FRAS1;NBEA;PDE3A;NES                                                                                                                                                                                                                             | 29.173319<br>729101188 |
| AR 19668381<br>ChIP-Seq PC3<br>Human             | 74/3519  | 4.128684041<br>157776E-7  | 6.657503016<br>366913E-5  | 1.745120442<br>7889382 | CLEC4M;PLOD2;KNDC1;PIK3C2G;LDB3;PTPRK;CHRDL1;ROBO1;CREB3L1;RPS6KA2;MCF2L;GRM8;FAM19A1;PHACTR1;RNF150;TMC1;EPHA4;CD96;MTUS1;GAB1;PRKCA;NPNT;PARD3B;NR5A2;RHOJ;CNKSR3;SCNN1A;SLC29A4;COL6A3;DGKI;PRTFDC1;LTK;DNAH7;HLA2;NXPH3;ZBTB46;PCDH15;PRDM15;SLC1A3;ATP1A3;TNFRSF11A;KLHL13;KALRN;LPP;THBS1;PRTG;GRIN2A;STK33;CALD1;SNTG1;GPC6;DRD5;TFAP2A;NTRK2;STARD13;OPN4;CRADD;EDEM1;TMEM132B;ECEL1;RASSF8;ARHGAP29;INHBB;PLXDC2;HSPA12B;HS3ST4;COLQ;SLC2A9;TSPAN15;NELL1;FRAS1;NBEA;SLC26A7;LPIN3                                                                                                                                                          | 25.653509<br>466354098 |
| SUZ12<br>18974828<br>ChIP-Seq<br>MESEs<br>Mouse  | 48/1934  | 9.861725822<br>227687E-7  | 1.272162631<br>0673717E-4 | 2.059670366<br>9216936 | LTK;KCNE3;PON2;RASEF;LPL;KCNA5;PLOD2;TNFRSF11A;ANTXR1;CHRDL1;THBS1;RERG;GRIN2A;SNTG1;CREB3L1;GRM8;RNF150;DLGAP2;GPC6;GPM6B;DRD5;EPHA4;NTRK2;ECEL1;MTUS1;GAB1;CTDSPL;ARHGAP29;INHBB;VASH1;PLXDC2;NPNT;DUSP26;POU4F1;PARD3B;GPRIN3;TDRD1;NELL1;MAFB;FRAS1;PRR16;PDE3A;PRR15;VWA2;GAS6;LY6H;NES;DGKI                                                                                                                                                                                                                                                                                                                                                    | 28.484076<br>358804696 |
| SUZ12<br>18692474<br>ChIP-Seq                    | 45/1909  | 8.903354150<br>592815E-6  | 9.571105711<br>887276E-4  | 1.956228304<br>8847022 | ACVRL1;RAB3B;LTK;KCNE3;PON2;RASEF;LPL;TNFRSF11A;RERG;PRTG;GRIN2A;SNTG1;GRM8;RNF150;DLGAP2;GPC6;GPM6B;DRD5;EPHA4;NTRK2;ECEL1;GAB1;PRKCA;INHBB;WNT9A;VASH1;NPNT;DUSP26;POU4F1;MTSS1;PARD3B;NELL1;PTP4A3;MAFB;FRAS1;RHOJ;PRR16;PDE3A;VWA2;GAS6;LY6H;PHLDB2;NES;CUEDC1;DGKI                                                                                                                                                                                                                                                                                                                                                                              | 22.749140<br>309896852 |

|                                                           |         |                           |                           |                        |                                                                                                                                                                                                                                                                                                                                                                                                                                                            |                        |
|-----------------------------------------------------------|---------|---------------------------|---------------------------|------------------------|------------------------------------------------------------------------------------------------------------------------------------------------------------------------------------------------------------------------------------------------------------------------------------------------------------------------------------------------------------------------------------------------------------------------------------------------------------|------------------------|
| MESCs<br>Mouse                                            |         |                           |                           |                        |                                                                                                                                                                                                                                                                                                                                                                                                                                                            |                        |
| SMARCD1<br>25818293<br>ChIP-Seq<br>ESCs Mouse             | 48/2119 | 1.220421281<br>3162046E-5 | 0.001124531<br>037784217  | 1.879850160<br>276808  | OCA2;PON2;MEI4;PCDH15;NRXN3;PLOD2;STON2;PTPRK;GDPD4;LPP;RASIP1;ROBO1;GHR;PRTG;GRIN2A;CACNG8;MECOM;SNTG1;GRM8;ST3GAL5;PHACTR1;RNF150;SNX7;SNX8;DLGAP2;GPC6;SAMD10;GPM6B;WWTR1;CRADD;ARHGEF15;TMEM132B;MTUS1;ABCA9;GAB1;HS3ST4;SHISA6;PAR3B;FERMT1;NELL1;MYO1B;FRAS1;NBEA;PRR16;SLC26A7;COL6A3;GAS6;DGKI                                                                                                                                                     | 21.268115<br>938087053 |
| TP63<br>23658742<br>ChIP-Seq<br>EP156T<br>Human           | 70/3652 | 2.663470713<br>2677645E-5 | 0.002147423<br>2625721353 | 1.590670490<br>3355404 | RAB3B;TMEM200A;RASEF;KIAA1671;PLOD2;PIK3C2G;STON2;PTPRK;ANTXR1;NUDT4;ROBO1;ADAMTSL1;SERP2;MECOM;SPTLC3;PSTPIP2;PEG10;MYC;GRM8;ENPP2;CA6;TMC1;CD96;MTUS1;GAB1;CTDSPL;C15ORF52;WNT9A;MTSS1;RFX8;MMP14;TMEM2;NR5A2;CNKSR3;VWA2;LY6H;CUEDC1;DGKI;OCA2;CALCRL;HHLA2;NXPH3;SLC1A3;RASAL1;PCDH12;GDPD4;KLHL13;THBS1;STK33;CALD1;ST3GAL5;SNX7;GPC6;DRD5;TFAP2A;WWTR1;ANKRD29;NTRK2;CRADD;EDEM1;TMEM132B;PLXDC2;NR2F6;SLC2A9;FERMT1;MAS1;FRAS1;NBEA;SPATS2L;SLC26A7 | 16.755002<br>17982376  |
| ARNT<br>22903824<br>ChIP-Seq<br>MCF-7<br>Human            | 28/1029 | 4.974791908<br>923525E-5  | 0.003565267<br>5347285262 | 2.258164676<br>659045  | RAB3B;PRDM15;SLC1A3;PIK3C2G;PTPRK;KLHL13;REGR;ROBO1;PCLO;SNTG1;PHACTR1;RNF150;NINL;GPC6;ADAMTS9;TFAP2A;EPHA4;ANKRD29;STARD13;RASSF8;INHBB;WNT9A;HS3ST4;RFX8;TMEM2;MYO1B;NBEA;SPATS2L                                                                                                                                                                                                                                                                       | 22.375119<br>366780172 |
| SMAD4<br>21799915<br>ChIP-Seq<br>A2780<br>Human           | 51/2464 | 6.971437800<br>660214E-5  | 0.004496577<br>381425838  | 1.717680659<br>5893732 | KCNC3;RASEF;KIAA1671;ROBO1;ADAMTSL1;RNF157;PCLO;SPTLC3;RPS6KA2;SLCO2B1;GRM8;ENPP2;C3ORF52;FAM19A1;PHACTR1;ADAMTS9;CD96;GAB1;PRKCA;SHISA6;PAR3B;KIAA1217;GPRIN3;RFX8;TMEM2;COL6A3;ECT2L;DGKI;CALCRL;CCDC149;PCDH15;NRXN3;SLC1A3;KALRN;LPP;THBS1;GRIN2A;STK33;SNTG1;WWTR1;STARD13;OPN4;TMEM132B;PLXDC2;FERMT1;NELL1;MYO1B;FRAS1;NBEA;SPATS2L;NES                                                                                                             | 16.440100<br>19273078  |
| SUZ12<br>18555785<br>ChIP-Seq<br>MESCs<br>Mouse           | 28/1058 | 8.033714331<br>791014E-5  | 0.004710677<br>94909564   | 2.196267913<br>3101677 | ACVRL1;RASEF;ATP1A3;KCNA5;KND1;TNFRSF11A;ANTXR1;GHR;GRIN2A;PEG10;GRM8;RNF150;DLGAP2;DRD5;ECEL1;GAB1;NPNT;DUSP26;POU4F1;NELL1;MAFB;FRAS1;PRR16;PDE3A;LY6H;PHLDB2;NES;DGKI                                                                                                                                                                                                                                                                                   | 20.709221<br>78682309  |
| AR<br>22383394<br>ChIP-Seq<br>PROSTATE<br>CANCER<br>Human | 41/1857 | 1.047867171<br>1382985E-4 | 0.005632286<br>044868355  | 1.832250741<br>279492  | RAB3B;DAGLA;TMEM200A;HHLA2;PCDH15;NRXN3;STON2;KALRN;CHRD1;LPP;THBS1;MIPOL1;ADAMTSL1;SERP2;GHR;MECOM;CREB3L1;ST3GAL5;PHACTR1;EPHA4;WWTR1;ANKRD29;STARD13;SLC10A2;EDEM1;GAB1;PRKCA;C14ORF132;VASH1;NPNT;GPRIN3;NELL1;TMEM2;MYO1B;MAFB;NBEA;SPATS2L;SLC26A7;COL6A3;PHLDB2;DGKI                                                                                                                                                                                | 16.789982<br>73248897  |
| CEBPD<br>23245923<br>ChIP-Seq<br>MEFs Mouse               | 17/504  | 1.399246281<br>8086037E-4 | 0.006942414<br>244358071  | 2.799183297<br>108608  | EPHA4;CALCRL;SLC10A2;MTUS1;SLC1A3;TNFRSF11A;PLXDC2;LPP;PAR3B;GHR;CDH5;MECOM;NBEA;MCF2L;ST3GAL5;RNF150;SNX7                                                                                                                                                                                                                                                                                                                                                 | 24.841090<br>867730948 |
| CTBP2<br>25329375<br>ChIP-Seq                             | 27/1053 | 1.816143670<br>462131E-4  | 0.008367233<br>338914818  | 2.127885945<br>313331  | RASEF;PCDH15;PLOD2;ELFN2;ROBO1;ADAMTSL1;TMEM100;GRIN2A;PCLO;SPTLC3;SNTG1;GRM8;ENPP2;GPC6;MUC4;EDEM1;TMEM132B;C14ORF132;DUSP26;HS3ST4;NELL1;FOLH1;MAFB;NBEA;PRR16;PDE3A;PHLDB2                                                                                                                                                                                                                                                                              | 18.328811<br>53577147  |

|                                                       |         |                           |                          |                        |                                                                                                                                                                                                                                                                                                                                                                                                                        |                        |
|-------------------------------------------------------|---------|---------------------------|--------------------------|------------------------|------------------------------------------------------------------------------------------------------------------------------------------------------------------------------------------------------------------------------------------------------------------------------------------------------------------------------------------------------------------------------------------------------------------------|------------------------|
| LNCAP<br>Human<br>GBX2<br>23144817<br>ChIP-Seq PC3    | 12/286  | 1.933708721<br>2627194E-4 | 0.008314947<br>501429694 | 3.481995183<br>2399965 | GHR;NELL1;NR5A2;PCDH15;ABCA9;FAM19A1;SLC26A7;PHACTR1;RNF150;COLQ;ROBO1;PARD3B                                                                                                                                                                                                                                                                                                                                          | 29.774194<br>68683292  |
| Human<br>P300<br>19829295<br>ChIP-Seq<br>ESCs Human   | 42/2000 | 2.540008769<br>2875893E-4 | 0.010239410<br>351190595 | 1.742738589<br>2116183 | CCDC149;HHLA2;FAM47A;PRDM15;KIAA1671;PIK3C2G;PTPRK;TNFRSF11A;ANTXR1;MIPOL1;ADAMTSL1;CDH5;GRIN2A;PCLO;MECOM;SPTLC3;SNTG1;CREB3L1;C3ORF52;CCL2;DLGAP2;GPC6;MUC4;TFAP2A;EPHA4;CRADD;SLC10A2;PLXDC2;HS3ST4;SHISA6;PARD3B;KIAA1217;MAS1;NELL1;TMEM2;FRAS1;NBEA;CNKSR3;PRR16;PDE3A;COL6A3;DGKI                                                                                                                               | 14.426691<br>253776069 |
| AHR<br>22903824<br>ChIP-Seq<br>MCF-7<br>Human         | 20/690  | 2.775080084<br>6911954E-4 | 0.010528980<br>32132836  | 2.405436286<br>0063745 | TFAP2A;EPHA4;ANKRD29;STARD13;PRDM15;RASSF8;SLC1A3;INHBB;WNT9A;RERG;ROBO1;RFX8;TMEM2;PCLO;NBEA;SNTG1;SPATS2L;PHACTR1;GPC6;ADAMTS9                                                                                                                                                                                                                                                                                       | 19.699707<br>176248793 |
| ZFP57<br>27257070<br>Chip-Seq<br>ESCs Mouse           | 27/1088 | 3.054652527<br>9714296E-4 | 0.010945838<br>225230957 | 2.059433731<br>9990235 | PLOD2;PTPRK;GDPD4;CHRDL1;THBS1;RERG;ROBO1;CDH5;SPTLC3;SNTG1;PEG10;RNF150;GPC6;TMC1;EPHA4;CR2;SLC10A2;EDEM1;VASH1;PLXDC2;DUSP26;POU4F1;PARD3B;NBEA;PRR16;SPATS2L;FAM171B                                                                                                                                                                                                                                                | 16.668386<br>331822752 |
| WT1<br>25993318<br>ChIP-Seq<br>PODOCYTE<br>Human      | 63/3464 | 3.582595747<br>7388944E-4 | 0.012161969<br>775218879 | 1.509300163<br>866875  | RAB3B;ROBO3;DAGLA;LDB3;ELFN2;ANTXR1;NUDT4;ROBO1;RNF157;SERP2;TMEM100;EMILIN1;PHACTR1;RNF150;DLGAP2;BAHCC1;ADAMTS9;EPHA4;PTGIR;GAB1;CTDSPL;PRKCA;VASH1;DUSP26;MTSS1;SHISA6;PARD3B;RFX8;PTP4A3;CNKSR3;PRR15;COL6A3;VWAA2;LTK;CCDC149;NXPH3;NRXN3;RASAL1;KALRN;LPP;THBS1;GRIN2A;CALD1;EPB41L3;ST3GAL5;GPC6;WWTR1;NTRK2;CRADD;SLC10A2;EDEM1;ARHGAP29;INHBB;PLXDC2;HSPA12B;NR2F6;TDRD1;TSPAN15;MAFB;FRAS1;PDE3A;SLC26A7;NES | 11.975168<br>998524289 |
| AR 25329375<br>ChIP-Seq<br>VCAP Human                 | 40/1906 | 3.690565682<br>6471495E-4 | 0.011902074<br>326537056 | 1.741606544<br>9573959 | OCA2;PON3;CALCRL;KCNC3;PLOD2;STON2;KALRN;RERG;NUDT4;ROBO1;MIPOL1;RNF157;GHR;PRTG;PCLO;MECOM;SPTLC3;CALD1;MYC;ENPP2;ST3GAL5;CCL2;GPC6;DRD5;TMC1;EPHA4;CD96;NTRK2;STARD13;CRADD;EDEM1;RASSF8;MTSS1;KIAA1217;TMEM2;NR5A2;FRAS1;SPATS2L;SLC26A7;LY6H                                                                                                                                                                       | 13.766634<br>518019675 |
| RNF2<br>27304074<br>Chip-Seq<br>ESCs Mouse            | 33/1467 | 3.855123532<br>249063E-4  | 0.011840736<br>563336408 | 1.866795645<br>2748857 | ROBO3;ZBTB46;FAM47A;RASEF;KCNA5;KALRN;RASIP1;RERG;RNF157;GRIN2A;JPH2;SNTG1;CREB3L1;DLGAP2;GPC6;BAHCC1;NTRK2;ARHGEF15;ECEL1;INHBB;WNT9A;POU4F1;SHISA6;PARD3B;TDRD1;ARHGAP31;NR5A2;MAFB;FRAS1;NBEA;PRR15;SPATS2L;VWAA2                                                                                                                                                                                                   | 14.674763<br>558233934 |
| UBF1/2<br>26484160<br>Chip-Seq<br>FIBROBLAST<br>Human | 41/2000 | 4.982779048<br>706993E-4  | 0.014608602<br>210981867 | 1.701244813<br>2780085 | DAGLA;CCDC149;RASEF;NRXN3;SLC1A3;PLOD2;PIK3C2G;PCDH12;PTPRK;ROBO1;MIPO1;ADAMTSL1;SERP2;TMEM100;PRTG;GRIN2A;STK33;CREB3L1;MYC;PHACTR1;ADAMTSL1;PTGIR;CRADD;SLC10A2;EDEM1;RASSF8;ARHGAP29;ZNF99;PLXDC2;SHISA6;KIAA1217;TSPAN15;TMEM2;FOLH1;IL2RA;PDE3A;VWAA2;DGKI;PRTFDC1;TSPYL5                                                                                                                                         | 12.936865<br>410033231 |
| STAT3<br>23295773<br>ChIP-Seq<br>U87 Human            | 58/3165 | 5.476968338<br>97327E-4   | 0.015359324<br>25494678  | 1.520782941<br>010665  | RAB3B;DAGLA;KCNC3;PLOD2;PIK3C2G;PTPRK;ANTXR1;ROBO1;ADAMTSL1;SERP2;GHR;TIFAB;PSTPIP2;RPS6KA2;GRM8;CA6;RNF150;ADAMTS9;CR2;MTUS1;CTDSPL;PRKCA;PARD3B;KIAA1217;FOLH1;RHOJ;PRR16;DGKI;OCA2;DNAH7;NXPH3;PCDH15;NRXN3;LPL;SLC1A3;LPP;MIPOL1;STK33;CALD1;EPB41L3;IL21R;ST3GAL5;SNX8;GPC6;GPM6B;WWTR1;                                                                                                                          | 11.420758<br>464824747 |

|                                                   |         |                           |                          |                        |                                                                                                                                                                                                                                                                                                                                                                                                                                                                                                                                                                                                                          |                        |
|---------------------------------------------------|---------|---------------------------|--------------------------|------------------------|--------------------------------------------------------------------------------------------------------------------------------------------------------------------------------------------------------------------------------------------------------------------------------------------------------------------------------------------------------------------------------------------------------------------------------------------------------------------------------------------------------------------------------------------------------------------------------------------------------------------------|------------------------|
| SUZ12<br>18692474<br>ChIP-Seq<br>MEFs Mouse       | 27/1135 | 5.870289179<br>769193E-4  | 0.015776402<br>170629703 | 1.974153216<br>224615  | TMEM132B;ABCA9;RASSF8;PLXDC2;COLQ;MAS1;TSPAN15;NELL1;MYO1B;NBEA;PDE3A<br>;SPATS2L<br>ACVRL1;RAB3B;LTK;KCNE3;LPL;TNFRSF11A;GRIN2A;SNTG1;GRM8;GPC6;GPM6B;DRD5;<br>EPHA4;NTRK2;ECEL1;GAB1;PRKCA;INHBB;DUSP26;POU4F1;PTP4A3;MAFB;PRR16;PDE3<br>A;GAS6;LY6H;NES                                                                                                                                                                                                                                                                                                                                                               | 14.688561<br>597896372 |
| IKZF1<br>21737484<br>ChIP-ChIP<br>HCT116<br>Human | 8/155   | 5.954892160<br>60615E-4   | 0.015363621<br>774363867 | 4.283228483<br>469415  | PTGIR;CACNG8;CALD1;KCNC3;CCR6;PLXDC2;ADAMTS9;MUC4                                                                                                                                                                                                                                                                                                                                                                                                                                                                                                                                                                        | 31.807799<br>880639593 |
| TP53<br>23651856<br>ChIP-Seq<br>MEFs Mouse        | 58/3193 | 6.840988084<br>616009E-4  | 0.016970912<br>748374332 | 1.507446917<br>7258865 | ROBO3;ROBO4;DAGLA;PLOD2;LDB3;ANTXR1;ROBO1;ADAMTSL1;RNF157;GHR;JPH2;PC<br>LO;MECOM;SIT1;RPS6KA2;FAM19A1;RNF150;DLGAP2;NINL;BAHCC1;TMC1;EPHA4;ARH<br>GEF15;MTUS1;PRKCA;WNT9A;PARD3B;ARC;MMP14;PTP4A3;GAS6;PHLDB2;CUEDC1;M<br>ATN3;DGKI;OCA2;LTK;ZBTB46;PCDH15;SLC1A3;PCDH12;KALRN;LPP;THBS1;CALD1;EPB4<br>1L3;IL21R;GPC6;NTRK2;STARD13;OPN4;PLXDC2;COLQ;SLC2A9;NELL1;NBEA;PDE3A;NES<br>CALCRL;LPL;SLC1A3;ANTXR1;LPP;THBS1;RERG;ROBO1;SERP2;GHR;SGCE;CDH5;MECOM<br>;CALD1;PEG10;CREB3L1;MYC;ENPP2;CCL2;PHACTR1;GPC6;BAHCC1;TMC1;STARD13;SL<br>C10A2;EDEM1;INHBB;PLXDC2;HSPA12B;GPRIN3;TMEM2;NBEA;CNKSR3;PRR16;GAS6;D<br>GKI | 10.985381<br>020194465 |
| CEBPD<br>21427703<br>ChIP-Seq<br>3T3-L1<br>Mouse  | 36/1735 | 9.203196837<br>480552E-4  | 0.021985414<br>667314653 | 1.721931911<br>9423153 | ROBO3;TMEM200A;SLC1A3;PCDH12;STON2;PTPRK;PEAR1;ELFN2;ANTXR1;THBS1;RASI<br>P1;SERP2;VMO1;GRIN2A;JPH2;MECOM;CREB3L1;MYC;FAM19A1;CCL2;EMILIN1;SNX7;<br>GPC6;BAHCC1;EPHA4;CD96;NTRK2;CRADD;FAM26E;MFSD6L;ABCA9;PRKCA;INHBB;WN<br>T9A;PLXDC2;MYO1B;CNKSR3;SPATS2L;NES;CUEDC1                                                                                                                                                                                                                                                                                                                                                  | 12.037663<br>471079751 |
| SMC1<br>22415368<br>ChIP-Seq<br>MEFs Mouse        | 40/2000 | 9.507964713<br>948065E-4  | 0.021902275<br>85891608  | 1.659751037<br>3443984 | RAB3B;KIAA1671;SLC1A3;PLOD2;STON2;PTPRK;TNFRSF11A;SLC6A20;CHRDL1;RERG;RO<br>BO1;ADAMTSL1;SERP2;GRIN2A;PCLO;SPTLC3;PEG10;CA6;GPC6;TFAP2A;ANKRD29;CRA<br>DD;MTUS1;ABCA9;GAB1;CTDSPL;ARHGAP29;PLXDC2;NPNT;HSPA12B;KIAA1217;TMEM<br>2;MYO1B;CNKSR3;PRR16;PDE3A;GAS6;PHLDB2;PRTFDC1;TSPYL5                                                                                                                                                                                                                                                                                                                                    | 11.548897<br>151338025 |
| CJUN<br>26792858<br>Chip-Seq<br>BT549<br>Human    | 40/2000 | 9.507964713<br>948065E-4  | 0.021147024<br>967229318 | 1.659751037<br>3443984 | RAB3B;KIAA1671;SLC1A3;PLOD2;STON2;PTPRK;TNFRSF11A;SLC6A20;CHRDL1;RERG;RO<br>BO1;ADAMTSL1;SERP2;GRIN2A;PCLO;SPTLC3;PEG10;CA6;GPC6;TFAP2A;ANKRD29;CRA<br>DD;MTUS1;ABCA9;GAB1;CTDSPL;ARHGAP29;PLXDC2;NPNT;HSPA12B;KIAA1217;TMEM<br>2;MYO1B;CNKSR3;PRR16;PDE3A;GAS6;PHLDB2;PRTFDC1;TSPYL5                                                                                                                                                                                                                                                                                                                                    | 11.548897<br>151338025 |
| JARID2<br>20064375<br>ChIP-Seq<br>MESCs<br>Mouse  | 26/1117 | 0.001019301<br>5325535456 | 0.021914982<br>94990123  | 1.931670858<br>1447788 | LTK;RASEF;TNFRSF11A;ELFN2;PRTG;GRIN2A;JPH2;GRM8;RNF150;DLGAP2;DRD5;NTRK<br>2;ECEL1;INHBB;NPNT;POU4F1;PARD3B;NELL1;MAFB;FRAS1;NBEA;PRR16;PDE3A;VWA2<br>;NES;DGKI                                                                                                                                                                                                                                                                                                                                                                                                                                                          | 13.306580<br>616771273 |
| JARID2<br>20075857<br>ChIP-Seq<br>MESCs<br>Mouse  | 28/1258 | 0.001281617<br>025194806  | 0.026665902<br>620988703 | 1.847099723<br>5947197 | LTK;NXPH3;RASEF;ATP1A3;ELFN2;GHR;PRTG;GRIN2A;MECOM;GRM8;DLGAP2;GPC6;G<br>PM6B;DRD5;NTRK2;ECEL1;CTDSPL;WNT9A;DUSP26;SHISA6;FERMT1;NELL1;MAFB;FRA<br>S1;PDE3A;VWA2;NES;DGKI                                                                                                                                                                                                                                                                                                                                                                                                                                                | 12.301005<br>714629076 |
| SOX2<br>21211035                                  | 60/3420 | 0.001296123<br>9357923023 | 0.026124998<br>080813592 | 1.455921962<br>5828055 | PLOD2;KNDC1;STON2;ANTXR1;ROBO1;ADAMTSL1;GHR;VMO1;CDH5;PSTPIP2;SLCO2B1<br>;GRM8;FAM19A1;PHACTR1;DLGAP2;ADAMTS9;EPHA4;RNF44;GAB1;CTDSPL;PRKCA;DU                                                                                                                                                                                                                                                                                                                                                                                                                                                                           | 9.6795181<br>71587524  |

|                                                                  |         |                           |                          |                        |                                                                                                                                                                                                                                                                                                 |                        |
|------------------------------------------------------------------|---------|---------------------------|--------------------------|------------------------|-------------------------------------------------------------------------------------------------------------------------------------------------------------------------------------------------------------------------------------------------------------------------------------------------|------------------------|
| ChIP-Seq<br>LN229 Gbm                                            |         |                           |                          |                        | SP26;ZDHC15;PARD3B;GPRIN3;ARC;TMEM2;NR5A2;FOLH1;PRR16;PRR15;TSPYL5;CALCRL;KCNE3;DNAH7;PCDH15;PRDM15;NRXN3;SLC1A3;ATP1A3;KALRN;LPP;THBS1;GRIN2A;CALD1;ST3GAL5;SNX7;GPC6;NTRK2;STARD13;SLC10A2;TMEM132B;ECEL1;PLXDC2;TRDR1;SLC2A9;NELL1;MAFB;NBEA;CD27                                            |                        |
| JUN<br>26020271<br>ChIP-Seq<br>SMOOTH<br>MUSCLE<br>Human         | 39/2000 | 0.001764122<br>8027997493 | 0.034480582<br>054722375 | 1.618257261<br>4107884 | PON3;ROBO4;TMEM200A;RASEF;STON2;PTPRK;GDPD4;TNFRSF11A;ELFN2;ANTXR1;SERP2;TMEM100;STK33;MYC;SLCO2B1;C3ORF52;CA6;SNX7;GPIHBP1;TMC1;WWTR1;CD96;RNF44;MFSD6L;RASSF8;C14ORF132;WNT9A;KIAA1217;SLC2A9;TSPAN15;TMEM2;MYO1B;ENAM;SCNN1A;PRR16;FAM171B;GAS6;PHLDB2;PRTFDC1                               | 10.259915<br>626602439 |
| TOP2B<br>26459242<br>ChIP-Seq<br>MCF-7<br>Human                  | 39/2000 | 0.001764122<br>8027997493 | 0.033466447<br>28840701  | 1.618257261<br>4107884 | OCA2;NRXN3;SLC1A3;PLOD2;KALRN;LPP;RERG;ROBO1;ADAMTSL1;GHR;JPH2;PCLO;MECOM;SPTLC3;SNTG1;PEG10;DLGAP2;DRD5;EPHA4;NTRK2;RNF44;EDEM1;TMEM132B;ABC9;C14ORF132;NPNT;HS3ST4;PARD3B;FERMT1;MAS1;NELL1;NBEA;CNKSR3;PRR16;PRR15;SLC29A4;LY6H;ECT2L;DGKI                                                   | 10.259915<br>626602439 |
| TBX3<br>20139965<br>ChIP-Seq<br>MECs<br>Mouse                    | 24/1068 | 0.002522849<br>2464299487 | 0.046492507<br>54135192  | 1.864888806<br>004942  | NTRK2;STARD13;DAGLA;RASEF;PCDH15;SLC1A3;PLXDC2;CHRD1;POU4F1;MTSS1;RASP1;NR2F6;GHR;TMEM100;MYO1B;NR5A2;SIT1;MYC;MCF2L;EPB41L3;PDE3A;RNF150;DLGAP2;GPC6                                                                                                                                           | 11.156448<br>063444802 |
| SMARCA4<br>23332759<br>ChIP-Seq<br>OLIGODEND<br>ROCYTES<br>Mouse | 46/2522 | 0.002550278<br>7109381838 | 0.045692493<br>570975795 | 1.513650827<br>0785554 | CALCRL;PON2;MEI4;NRXN3;LPL;SLC1A3;PIK3C2G;STON2;PTPRK;NUDT4;ROBO1;SERP2;GHR;TMEM100;MECOM;SNTG1;MYC;EPB41L3;SNX7;ADAMTS9;GPM6B;TMC1;EPHA4;CD96;NTRK2;STARD13;CRADD;SLC10A2;TMEM132B;MTUS1;GAB1;PRKCA;PLXDC2;DUSP26;LYVE1;SHISA6;PARD3B;NR5A2;FOLH1;CNKSR3;PDE3A;SPATS2L;SLC26A7;NES;CUEDC1;DGKI | 9.0388455<br>73372782  |

## NCI Nature 2016 database, only P<0.10 included

| Term                                                                                                  | Overlap | P-value                  | Adjusted P-value | Odds Ratio             | Combined Score         | Genes                 |
|-------------------------------------------------------------------------------------------------------|---------|--------------------------|------------------|------------------------|------------------------|-----------------------|
| EPHA forward signaling Homo sapiens f25420e8-6191-11e5-8ac5-06603eb7f303                              | 3/34    | 0.00785079984603<br>1632 | 1.0              | 7.3224310471076<br>4   | 35.492847409061<br>43  | EPHA4;ARHGEF15;PIK3R6 |
| Thromboxane A2 receptor signaling Homo sapiens 27d5800d-6196-11e5-8ac5-06603eb7f303                   | 3/56    | 0.03000182292102<br>1278 | 1.0              | 4.4457617071724<br>96  | 15.589050689679<br>897 | PTGIR;PRKCA;PIK3R6    |
| SHP2 signaling Homo sapiens 85755aa4-6195-11e5-8ac5-06603eb7f303                                      | 3/57    | 0.03139482319953<br>9006 | 1.0              | 4.3677658877484<br>165 | 15.117328088738<br>082 | NTRK2;IL2RA;GAB1      |
| Neurotrophic factor-mediated Trk receptor signaling Homo sapiens 774988f5-6194-11e5-8ac5-06603eb7f303 | 3/61    | 0.03729988253640<br>3    | 1.0              | 4.0813550098632<br>75  | 13.422617923251<br>844 | NTRK2;MCF2L;GAB1      |
| Validated nuclear estrogen receptor alpha network Homo sapiens 58949883-6196-11e5-8ac5-06603eb7f303   | 3/64    | 0.04207451045748<br>936  | 1.0              | 3.8900414937759<br>336 | 12.324869712021<br>147 | MYC;PRDM15;POU4F1     |
| IL8- and CXCR1-mediated signaling events Homo sapiens f6a58ef3-6193-11e5-8ac5-06603eb7f303            | 2/28    | 0.04451070740410<br>945  | 1.0              | 5.9276822762299<br>93  | 18.447098416897<br>465 | PRKCA;PIK3R6          |
| Beta1 integrin cell surface interactions Homo sapiens 2fd0bc63-618d-11e5-8ac5-06603eb7f303            | 3/66    | 0.04541977139349<br>9536 | 1.0              | 3.7721614485099<br>964 | 11.662798096890<br>265 | COL6A3;NPNT;THBS1     |
| Signaling events mediated by VEGFR1 and VEGFR2 Homo sapiens d6f6ae1f-6195-11e5-8ac5-06603eb7f303      | 3/68    | 0.04889294413398<br>138  | 1.0              | 3.6612155235538<br>2   | 11.049995794426<br>364 | CDH5;GAB1;PRKCA       |
| IL2 signaling events mediated by STAT5 Homo sapiens 9938526b-6193-11e5-8ac5-06603eb7f303              | 2/30    | 0.05043089644037<br>3164 | 1.0              | 5.5325034578146<br>61  | 16.526424714340<br>614 | MYC;IL2RA             |
| Syndecan-4-mediated signaling events Homo sapiens 076bc549-6196-11e5-8ac5-06603eb7f303                | 2/31    | 0.05349128606119<br>4694 | 1.0              | 5.3540356043367<br>69  | 15.677882563014<br>219 | PRKCA;THBS1           |
| Regulation of Ras family activation Homo sapiens 397d91c7-6195-11e5-8ac5-06603eb7f303                 | 2/31    | 0.05349128606119<br>4694 | 1.0              | 5.3540356043367<br>69  | 15.677882563014<br>219 | RASAL1;PRKCA          |
| IL8- and CXCR2-mediated signaling events Homo sapiens fe78e284-6193-11e5-8ac5-06603eb7f303            | 2/34    | 0.06304957149588<br>485  | 1.0              | 4.8816206980717<br>59  | 13.491989323178<br>268 | PRKCA;PIK3R6          |
| IL2 signaling events mediated by PI3K Homo sapiens 8bbf39aa-6193-11e5-8ac5-06603eb7f303               | 2/35    | 0.06635491067396<br>887  | 1.0              | 4.7421458209839<br>95  | 12.864196843047<br>813 | MYC;IL2RA             |
| PDGFR-beta signaling pathway Homo sapiens c901a3e4-6194-11e5-8ac5-06603eb7f303                        | 4/128   | 0.06930470200280<br>744  | 1.0              | 2.5933609958506<br>225 | 6.9223094531110<br>56  | MYC;GAB1;PRKCA;PIK3R6 |
| Class IB PI3K non-lipid kinase events Homo sapiens 263703f8-6191-11e5-8ac5-06603eb7f303               | 1/6     | 0.07016487528480<br>36   | 0.97763059563    | 13.831258644536<br>652 | 36.748374069662<br>006 | PIK3R6                |
| Signaling events regulated by Ret tyrosine kinase Homo sapiens e4431190-6195-11e5-8ac5-06603eb7f303   | 2/38    | 0.07660255718312<br>824  | 1.0              | 4.3677658877484<br>165 | 11.221335746674<br>201 | GAB1;PRKCA            |
| BMP receptor signaling Homo sapiens 2a3c66e7-618e-11e5-8ac5-06603eb7f303                              | 2/42    | 0.09097392706510<br>637  | 1.0              | 3.9517881841533<br>29  | 9.4731568041368<br>63  | CTDSPL;CHRDL1         |
| EphrinA-EPHA pathway Homo sapiens 1fd12dbd-6192-11e5-8ac5-06603eb7f303                                | 1/8     | 0.09244604413320<br>6    | 1.0              | 10.373443983402<br>49  | 24.700519826984<br>653 | EPHA4                 |
| Ceramide signaling pathway Homo sapiens d3747df2-6190-11e5-8ac5-06603eb7f303                          | 2/44    | 0.09843270201571<br>447  | 1.0              | 3.7721614485099<br>964 | 8.7453119297538<br>64  | CRADD;MYC             |

## KEA 2015 database, only P<0.05 included

| Term    | Overlap | P-value               | Adjusted P-value    | Odds Ratio         | Combined Score     | Genes                                                      |
|---------|---------|-----------------------|---------------------|--------------------|--------------------|------------------------------------------------------------|
| PAK2    | 3/15    | 7.06347365139663E-4   | 0.30231667227977577 | 16.597510373443985 | 120.42163357445777 | CALD1;MYC;MYL9                                             |
| CSNK1A1 | 5/84    | 0.0034743197337771797 | 0.7435044230283164  | 4.939735230191661  | 27.970542280147225 | DAGLA;PCLO;ENAM;EPB41L3;DLGAP2                             |
| CDK5    | 5/97    | 0.006397001006610164  | 0.9126388102763835  | 4.277708859135047  | 21.610668568069254 | NTRK2;GRIN2A;MYC;KALRN;NES                                 |
| CDK15   | 3/36    | 0.009203982425330309  | 0.984826119510343   | 6.915629322268326  | 32.42129333520625  | GRIN2A;CALD1;NES                                           |
| CDK18   | 3/37    | 0.009928410722557174  | 0.8498719578508942  | 6.72872042166648   | 31.035246350667034 | GRIN2A;CALD1;NES                                           |
| CDK11A  | 3/38    | 0.010685104910941845  | 0.7622041503138517  | 6.551648831622625  | 29.73730883424778  | GRIN2A;CALD1;NES                                           |
| MYLK4   | 1/1     | 0.012049887812373218  | 0.736764569099391   | 82.98755186721992  | 366.6970895655858  | MYL9                                                       |
| MYLK3   | 1/1     | 0.012049887812373218  | 0.6446689979619672  | 82.98755186721992  | 366.6970895655858  | MYL9                                                       |
| CIT     | 1/1     | 0.012049887812373218  | 0.5730391092995264  | 82.98755186721992  | 366.6970895655858  | MYL9                                                       |
| LTK     | 1/1     | 0.012049887812373218  | 0.5157351983695737  | 82.98755186721992  | 366.6970895655858  | LTK                                                        |
| MTOR    | 4/78    | 0.01463982634934086   | 0.569622334319808   | 4.255771890626662  | 17.976421457189655 | MYC;ARHGAP29;PHLDB2;NES                                    |
| CDK14   | 3/43    | 0.014960483367879994  | 0.5335905734543864  | 5.789829200038599  | 24.330848188385332 | GRIN2A;CALD1;NES                                           |
| EPHA4   | 1/2     | 0.023955228768517783  | 0.7886798394558162  | 41.49377593360996  | 154.83687380767483 | EPHA4                                                      |
| PIK3CG  | 1/3     | 0.03571770591610492   | 1.0                 | 27.662517289073303 | 92.17451588131405  | PIK3C2G                                                    |
| PIM2    | 1/3     | 0.03571770591610492   | 1.0                 | 27.662517289073303 | 92.17451588131405  | MYC                                                        |
| PRKCA   | 10/44   | 0.042358813546768834  | 1.0                 | 1.8775464223352922 | 5.93601090376095   | GRIN2A;JPH2;PTGIR;KCNE3;IL2RA;PDE3A;PRKCA;KCNA5;MYL9;NR2F6 |
| MYLK    | 1/4     | 0.047339019567566404  | 1.0                 | 20.74688796680498  | 63.286729990769146 | MYL9                                                       |
| INSR    | 4/113   | 0.04792561845926756   | 1.0                 | 2.937612455476811  | 8.924775339924288  | NTRK2;CALD1;GAB1;LPP                                       |

## Bioplanet 2019 database, only P<0.05 included

| Term                                                              | Overlap | P-value               | Adjusted P-value   | Odds Ratio         | Genes                                                 | Combined Score     |
|-------------------------------------------------------------------|---------|-----------------------|--------------------|--------------------|-------------------------------------------------------|--------------------|
| Rho GTPase cycle                                                  | 7/123   | 7.344799646401101E-4  | 1.0                | 4.72286880545154   | SYDE1;STARD13;ARHGAP31;MCF2L;RH OJ;ARHGAP29;KALRN     | 34.08186410410626  |
| Thymic stromal lymphopoietin (TSLP) pathway                       | 6/90    | 7.702250262285714E-4  | 0.5815198948025714 | 5.532503457814661  | MYC;IL2RA;CCL2;CCR6;TNFRSF11A;CCL17                   | 39.661564835162324 |
| Low-density lipoprotein (LDL) pathway during atherogenesis        | 2/6     | 0.002100859666622271  | 1.0                | 27.662517289073303 | CCL2;LPL                                              | 170.55072345675106 |
| Phase I of biological oxidations: non-cytochrome P450 enzymes     | 2/7     | 0.0029178656964145657 | 1.0                | 23.710729104919974 | PON3;PON2                                             | 138.39722242664922 |
| Cytokine-cytokine receptor interaction                            | 9/265   | 0.00499304218116831   | 1.0                | 2.8184451577546388 | GHR;IL2RA;IL21R;CD27;CCL2;INHBB;CC R6;TNFRSF11A;CCL17 | 14.936941703576487 |
| MAPK cascade role in angiogenesis                                 | 4/64    | 0.007425785012787047  | 1.0                | 5.186721991701245  | ROBO4;MMP14;PRKCA;ROBO1                               | 25.4294443685376   |
| Ephrin receptor A forward pathway                                 | 3/34    | 0.007850799846031632  | 1.0                | 7.32243104710764   | EPHA4;ARHGEF15;PIK3R6                                 | 35.49284740906143  |
| Reversible hydration of carbon dioxide                            | 2/12    | 0.008813339250145349  | 1.0                | 13.831258644536652 | CA7;CA6                                               | 65.44244649127494  |
| Vascular smooth muscle contraction                                | 5/116   | 0.0132636919126241    | 1.0                | 3.5770496494491346 | PTGIR;CALCRL;CALD1;PRKCA;MYL9                         | 15.46260161752144  |
| Aldosterone-regulated sodium reabsorption                         | 3/42    | 0.014039181674892825  | 1.0                | 5.927682276229993  | SCNN1A;ATP1A3;PRKCA                                   | 25.2869185971972   |
| Cadmium-induced DNA biosynthesis and proliferation in macrophages | 2/17    | 0.01745703716897542   | 1.0                | 9.763241396143519  | MYC;PRKCA                                             | 39.521722582071035 |
| Synaptic proteins at the synaptic junction                        | 2/17    | 0.01745703716897542   | 1.0                | 9.763241396143519  | PCLO;NRXN3                                            | 39.521722582071035 |
| Neuroactive ligand-receptor interaction                           | 8/272   | 0.01765571822809162   | 1.0                | 2.4408103490358797 | CHRNA1;GHR;MAS1;GRIN2A;PTGIR;CA LCRL;GRM8;DRD5        | 9.852808321073878  |
| Pertussis toxin-insensitive CCR5                                  | 2/18    | 0.01948499755087271   | 1.0                | 9.220839096357768  | CCL2;PRKCA                                            | 36.31268294960286  |

|                                                                         |       |                      |     |                    |                                                       |                    |
|-------------------------------------------------------------------------|-------|----------------------|-----|--------------------|-------------------------------------------------------|--------------------|
| signaling in macrophage                                                 |       |                      |     |                    |                                                       |                    |
| Telomeres, telomerase, cellular aging, and immortality                  | 2/19  | 0.021606567524768253 | 1.0 | 8.735531775496833  | MYC;PRKCA                                             | 33.4986499972385   |
| Neuronal system                                                         | 8/283 | 0.02179395149472822  | 1.0 | 2.345937861970881  | CHRNA1;GRIN2A;CACNG8;RPS6KA2;KCNC3;SLC1A3;PRKCA;KCNA5 | 8.975846345890812  |
| Binding of chemokines to chemokine receptors                            | 3/54  | 0.027316490665269092 | 1.0 | 4.610419548178884  | CCL2;CCR6;CCL17                                       | 16.598730776788134 |
| Transmission across chemical synapses                                   | 6/190 | 0.027871381731980623 | 1.0 | 2.62065953264905   | CHRNA1;GRIN2A;CACNG8;RPS6KA2;SLC1A3;PRKCA             | 9.382366964745284  |
| CCR3 signaling in eosinophils                                           | 2/22  | 0.028507861611188002 | 1.0 | 7.544322897019993  | PIK3C2G;PRKCA                                         | 26.839497425420223 |
| Smooth muscle contraction                                               | 2/22  | 0.028507861611188002 | 1.0 | 7.544322897019993  | CALD1;MYL9                                            | 26.839497425420223 |
| Nitric oxide signaling pathway                                          | 2/22  | 0.028507861611188002 | 1.0 | 7.544322897019993  | GRIN2A;PRKCA                                          | 26.839497425420223 |
| TSH regulation of gene expression                                       | 4/97  | 0.029850426068272342 | 1.0 | 3.4221670873080376 | MYC;ARHGAP29;CCL2;PHLDB2                              | 12.017131935154822 |
| Thromboxane A2 receptor signaling                                       | 3/56  | 0.030001822921021278 | 1.0 | 4.445761707172496  | PTGIR;PRKCA;PIK3R6                                    | 15.589050689679897 |
| Nitrogen metabolism                                                     | 2/23  | 0.03097902832932554  | 1.0 | 7.216308858019123  | CA7;CA6                                               | 25.07266685142142  |
| SHP2 signaling                                                          | 3/57  | 0.031394823199539006 | 1.0 | 4.3677658877484165 | NTRK2;IL2RA;GAB1                                      | 15.117328088738082 |
| Mechanism of gene regulation by peroxisome proliferators via PPAR-alpha | 3/57  | 0.031394823199539006 | 1.0 | 4.3677658877484165 | MYC;LPL;PRKCA                                         | 15.117328088738082 |
| Jak-STAT signaling pathway                                              | 6/199 | 0.033835192559259375 | 1.0 | 2.502137242227736  | GHR;PTP4A3;MYC;IL2RA;IL21R;PTPRK                      | 8.472871790123595  |
| Neurotrophic factor-mediated Trk receptor signaling                     | 3/60  | 0.035773912027314135 | 1.0 | 4.149377593360996  | NTRK2;MCF2L;GAB1                                      | 13.819652969035918 |
| Maturity onset diabetes of the young                                    | 2/25  | 0.036163312120247336 | 1.0 | 6.639004149377594  | NR5A2;BHLHA15                                         | 22.039569469922412 |

|                                                         |         |                          |     |                    |                                                                                                                             |                    |
|---------------------------------------------------------|---------|--------------------------|-----|--------------------|-----------------------------------------------------------------------------------------------------------------------------|--------------------|
| PIP2 hydrolysis                                         | 2/25    | 0.0361633121202<br>47336 | 1.0 | 6.639004149377594  | DAGLA;DGKI                                                                                                                  | 22.039569469922412 |
| Platelet activation,<br>signaling and<br>aggregation    | 6/205   | 0.0382376706779<br>388   | 1.0 | 2.428903957089364  | DAGLA;PRKCA;GAS6;THBS1;PIK3R6;DG<br>KI                                                                                      | 7.927782465470397  |
| Interleukin-9<br>regulation of target<br>genes          | 2/26    | 0.0388718656281<br>3442  | 1.0 | 6.383657835939994  | MYC;CCL2                                                                                                                    | 20.730830122325457 |
| Gastrin-CREB<br>signaling pathway<br>via PKC and MAPK   | 6/206   | 0.0390052660325<br>5446  | 1.0 | 2.4171131611811627 | OPN4;DAGLA;RPS6KA2;PRKCA;KALRN;<br>DGKI                                                                                     | 7.841256775148828  |
| Signal transduction                                     | 19/1020 | 0.0401270669688<br>4281  | 1.0 | 1.5458465543893907 | NTRK2;OPN4;CALCRL;DAGLA;GAB1;AR<br>HGAP29;KALRN;CHRDL1;GHR;ARHGAP<br>31;MYC;MCF2L;GRM8;COL6A3;CCL2;C<br>CR6;CCL17;DGKI;DRD5 | 4.970985235270855  |
| eIF4E and p70 S6<br>kinase regulation                   | 2/27    | 0.0416550559494<br>02366 | 1.0 | 6.147226064238512  | GHR;PRKCA                                                                                                                   | 19.537928547068844 |
| Validated nuclear<br>estrogen receptor<br>alpha network | 3/64    | 0.0420745104574<br>8936  | 1.0 | 3.8900414937759336 | MYC;PRDM15;POU4F1                                                                                                           | 12.324869712021147 |
| Epidermal growth<br>factor receptor<br>(EGFR) pathway   | 4/111   | 0.0453975731508<br>0996  | 1.0 | 2.9905424096295468 | RPS6KA2;RHOJ;GAB1;PRKCA                                                                                                     | 9.247644215742422  |
| Beta-1 integrin cell<br>surface interactions            | 3/66    | 0.0454197713934<br>99536 | 1.0 | 3.7721614485099964 | COL6A3;NPNT;THBS1                                                                                                           | 11.662798096890265 |

## Encode and Chea consensus, only P<0.05 included

| Term       | Overlap | P-value                   | Adjusted P-value           | Odds Ratio             | Genes                                                                                                                                                                                                                                                                                                                                                          | Combined Score     |
|------------|---------|---------------------------|----------------------------|------------------------|----------------------------------------------------------------------------------------------------------------------------------------------------------------------------------------------------------------------------------------------------------------------------------------------------------------------------------------------------------------|--------------------|
| SUZ12 CHEA | 57/1684 | 5.096161565<br>838674E-13 | 5.300008028<br>4722215E-11 | 2.808961078<br>641054  | ACVRL1;TMEM200A;RASEF;PEAR1;ELFN2;ANTXR1;RERG;LAMP5;MECOM;PEG10;GRM8;CA7;RNF150;DLGAP2;GAB1;PRKCA;VASH1;NPNT;DUSP26;SHISA6;PARD3B;RHOJ;PRR16;PRR15;VWA2;GAS6;LY6H;PHLDB2;CUEDC1;DGKI;LTK;KCNE3;ZBTB46;PON2;LPL;KCNA5;TNFRSF11A;SLC6A20;GRIN2A;SNTG1;GPC6;GPM6B;DRD5;TFAP2A;NTRK2;ECEL1;INHBB;POU4F1;FERMT1;NELL1;ARHGAP31;FRAS1;MAFB;PDE3A;SPATS2L;FAM171B;NES | 79.50797643639592  |
| AR CHEA    | 30/1095 | 2.309800399<br>508606E-5  | 0.001201096<br>207744475   | 2.273631558<br>006025  | HHLA2;PCDH15;KALRN;CHRD1;LPP;THBS1;GHR;MECOM;CREB3L1;PHACTR1;TMC1;EPHA4;STARD13;OPN4;EDEM1;GAB1;PRKCA;INHBB;NPNT;GRIN3;NELL1;FRAS1;MAFB;NBEA;SPATS2L;COL6A3;SLC26A7;VWA2;PHLDB2;DGKI                                                                                                                                                                           | 24.272754734971794 |
| REST CHEA  | 26/1280 | 0.006391217<br>439532846  | 0.221562204<br>57047202    | 1.685684647<br>3029046 | PCDH15;NRXN3;TNFRSF11A;ELFN2;LAMP5;GRIN2A;SNTG1;SPTLC3;SLCO2B1;DLGAP2;CCL17;GPIHBP1;DRD5;TMC1;EPHA4;NTRK2;CRADD;ECEL1;PRKCA;INHBB;POU4F1;SLC2A9;NELL1;ARC;SLC26A7;LY6H                                                                                                                                                                                         | 8.517478809592312  |
| EZH2 CHEA  | 8/237   | 0.008224575<br>045234637  | 0.213838951<br>17610055    | 2.801267573<br>5770434 | ACVRL1;ECEL1;GRM8;INHBB;RNF150;SLC6A20;ELFN2;DLGAP2                                                                                                                                                                                                                                                                                                            | 13.4478453697451   |
| SMAD4 CHEA | 14/584  | 0.011599847<br>522382647  | 0.241276828<br>46555903    | 1.989427613<br>255272  | STARD13;TMEM132B;NRXN3;KIAA1671;THBS1;ROBO1;ADAMTSL1;FERMT1;ARHGAP31;MYO1B;FRAS1;RPS6KA2;ECT2L;DGKI                                                                                                                                                                                                                                                            | 8.866408025649054  |
| TP63 CHEA  | 25/1399 | 0.031331906<br>40739252   | 0.543086377<br>7281371     | 1.482979840<br>37205   | OCA2;RASEF;SLC1A3;PCDH12;ANTXR1;STK33;PEG10;GRM8;ST3GAL5;TFAP2A;WWTR1;CRADD;MTUS1;CTDSPL;C15ORF52;PLXDC2;NR2F6;SLC2A9;FERMT1;MAS1;MMP14;TMEM2;FRAS1;SPATS2L;DGKI                                                                                                                                                                                               | 5.135734663180917  |
| TP53 CHEA  | 8/319   | 0.040059226<br>35116332   | 0.595165648<br>645855      | 2.081192523<br>31586   | EPHA4;NTRK2;NELL1;JPH2;CALD1;GAS6;GPC6;PARD3B                                                                                                                                                                                                                                                                                                                  | 6.696021043319476  |
| SOX2 CHEA  | 15/775  | 0.048905446<br>83230316   | 0.635770808<br>8199411     | 1.606210681<br>3010308 | TFAP2A;EPHA4;MTUS1;LPP;MTSS1;RERG;NUDT4;ADAMTSL1;ARC;NR5A2;CALD1;PEG10;SCNN1A;PHACTR1;GPC6                                                                                                                                                                                                                                                                     | 4.8473294095153046 |

## MSigDB Oncogenic Signatures, only P<0.05 included

| Term                      | Overlap | P-value               | Adjusted P-value   | Odds Ratio         | Genes                                               | Combined Score     |
|---------------------------|---------|-----------------------|--------------------|--------------------|-----------------------------------------------------|--------------------|
| VEGF A UP.V1 UP           | 9/196   | 6.409001000718936E-4  | 0.1211301189135879 | 3.8106528918621394 | CHRNA1;ARC;KCNC3;ENPP2;CCL2;EMILIN1;MYL9;MTSS1;COLQ | 28.018347307054846 |
| CSR LATE UP.V1 DN         | 7/170   | 0.0046245750751206585 | 0.4370223445989022 | 3.4171344886502317 | ACVRL1;ANKRD29;ROBO3;NBEA;CALD1;CCL2;GAS6           | 18.371782043064258 |
| KRAS.KIDNEY UP.V1 UP      | 6/145   | 0.008340285489262123  | 0.5254379858235138 | 3.433967663471169  | TMEM100;MAFB;EPB41L3;SLC1A3;KCNA5;DLGAP2            | 16.437228210745914 |
| PIGF UP.V1 DN             | 7/194   | 0.009309058713831154  | 0.439853024228522  | 2.9943962013945327 | ARC;LTK;KCNC3;MCF2L;ENPP2;ATP1A3;MYL9               | 14.004094230908049 |
| WNT UP.V1 UP              | 6/180   | 0.022111868425911427  | 0.835828626499452  | 2.7662517289073305 | CDH5;CD96;KRT27;KCNC3;CCL2;INHBB                    | 10.543957902523628 |
| PTEN DN.V1 UP             | 6/191   | 0.02849684882762119   | 0.8976507380700675 | 2.606938802111622  | EPHA4;SIT1;PRR16;CD27;INHBB;KALRN                   | 9.27538858231831   |
| KRAS.PROSTATE UP.V1 UP    | 5/143   | 0.029680271601112102  | 0.8013673332300267 | 2.901662652699997  | CR2;NBEA;NXPH3;SLC10A2;NES                          | 10.20593886122497  |
| KRAS.LUNG.BREAST UP.V1 DN | 5/145   | 0.03124736810700751   | 0.7382190715280524 | 2.8616397195593075 | FRAS1;AMBN;SYNDIG1;PDE3A;MYL9                       | 9.917928536048757  |
| ATM DN.V1 DN              | 5/149   | 0.03453496236240402   | 0.7252342096104845 | 2.7848171767523464 | ACVRL1;NTRK2;HHLA2;SLC10A2;GRM8                     | 9.373090496201431  |

## Biocarta 2016, only P<0.05 included

| Term                                                                                           | Overlap | P-value              | Adjusted P-value | Odds Ratio         | Combined Score     | Genes         |
|------------------------------------------------------------------------------------------------|---------|----------------------|------------------|--------------------|--------------------|---------------|
| Telomeres, Telomerase, Cellular Aging, and Immortality Homo sapiens h telPathway               | 2/15    | 0.013692307500393935 | 1.0              | 11.065006915629322 | 47.47907164777607  | MYC;PRKCA     |
| Cadmium induces DNA synthesis and proliferation in macrophages Homo sapiens h cdMacPathway     | 2/16    | 0.015525264834032    | 1.0              | 10.37344398340249  | 43.20836714476457  | MYC;PRKCA     |
| Nitric Oxide Signaling Pathway Homo sapiens h nos1Pathway                                      | 2/19    | 0.021606567524768253 | 1.0              | 8.735531775496833  | 33.4986499972385   | GRIN2A;PRKCA  |
| Mechanism of Gene Regulation by Peroxisome Proliferators via PPARa Homo sapiens h pparaPathway | 3/52    | 0.02476589413991239  | 1.0              | 4.787743376954995  | 17.706452961747683 | MYC;LPL;PRKCA |
| Growth Hormone Signaling Pathway Homo sapiens h ghPathway                                      | 2/22    | 0.028507861611188002 | 1.0              | 7.544322897019993  | 26.839497425420223 | GHR;PRKCA     |
| CCR3 signaling in Eosinophils Homo sapiens h CCR3Pathway                                       | 2/23    | 0.03097902832932554  | 1.0              | 7.216308858019123  | 25.07266685142142  | PIK3C2G;PRKCA |
| Regulation of eIF4e and p70 S6 Kinase Homo sapiens h eif4Pathway                               | 2/24    | 0.03353161297317188  | 1.0              | 6.915629322268326  | 23.480405354685843 | GHR;PRKCA     |

## Reactome 2016, only P<0.05 included

| Term                                                                                                             | Overlap | P-value              | Adjusted P-value | Odds Ratio         | Genes                                                  | Combined Score     |
|------------------------------------------------------------------------------------------------------------------|---------|----------------------|------------------|--------------------|--------------------------------------------------------|--------------------|
| Rho GTPase cycle Homo sapiens R-HSA-194840                                                                       | 7/122   | 6.99730714042046E-4  | 1.0              | 4.761580844840487  | SYDE1;STARD13;ARHGAP31;MCF2L ;RHOJ;ARHGAP29;KALRN      | 34.59200390321901  |
| Diseases of glycosylation Homo sapiens R-HSA-3781865                                                             | 5/88    | 0.004241527998131693 | 1.0              | 4.715201810637495  | ADAMTSL1;ADAMTS9;THBS1;GPC6; MUC4                      | 25.7583539123943   |
| Diseases associated with O-glycosylation of proteins Homo sapiens R-HSA-3906995                                  | 4/62    | 0.006642222211633706 | 1.0              | 5.354035604336769  | ADAMTSL1;ADAMTS9;THBS1;MUC 4                           | 26.846787316593158 |
| Reversible hydration of carbon dioxide Homo sapiens R-HSA-1475029                                                | 2/12    | 0.008813339250145349 | 1.0              | 13.831258644536652 | CA7;CA6                                                | 65.44244649127494  |
| Defective B3GALTL causes Peters-plus syndrome (PpS) Homo sapiens R-HSA-5083635                                   | 3/37    | 0.009928410722557174 | 1.0              | 6.72872042166648   | ADAMTSL1;THBS1;ADAMTS9                                 | 31.035246350667034 |
| O-glycosylation of TSR domain-containing proteins Homo sapiens R-HSA-5173214                                     | 3/38    | 0.010685104910941845 | 1.0              | 6.551648831622625  | ADAMTSL1;THBS1;ADAMTS9                                 | 29.73730883424778  |
| Depolymerisation of the Nuclear Lamina Homo sapiens R-HSA-4419969                                                | 2/15    | 0.013692307500393935 | 1.0              | 11.065006915629322 | PRKCA;LPIN3                                            | 47.47907164777607  |
| Syndecan interactions Homo sapiens R-HSA-3000170                                                                 | 2/20    | 0.02381921634833939  | 1.0              | 8.298755186721992  | PRKCA;THBS1                                            | 31.014627506144365 |
| Neurotransmitter Receptor Binding And Downstream Transmission In The Postsynaptic Cell Homo sapiens R-HSA-112314 | 5/142   | 0.028915728725035107 | 1.0              | 2.922096896733096  | CHRNA1;GRIN2A;CACNG8;RPS6KA2 ;PRKCA                    | 10.354069269391557 |
| Neuronal System Homo sapiens R-HSA-112316                                                                        | 8/301   | 0.029974854230399816 | 1.0              | 2.2056492190623236 | CHRNA1;GRIN2A;CACNG8;RPS6KA2 ;KCNC3;SLC1A3;PRKCA;KCNA5 | 7.736086221297395  |
| Chemokine receptors bind chemokines Homo sapiens R-HSA-380108                                                    | 3/56    | 0.030001822921021278 | 1.0              | 4.445761707172496  | CCL2;CCR6;CCL17                                        | 15.589050689679897 |
| Muscle contraction Homo sapiens R-HSA-397014                                                                     | 6/196   | 0.031762972865536414 | 1.0              | 2.540435261241426  | WWTR1;CACNG8;KCNE3;CALD1;AT P1A3;MYL9                  | 8.763114682628133  |

|                                                                              |         |                      |     |                    |                                                                                                                                                                                                                                          |                    |
|------------------------------------------------------------------------------|---------|----------------------|-----|--------------------|------------------------------------------------------------------------------------------------------------------------------------------------------------------------------------------------------------------------------------------|--------------------|
| Platelet activation, signaling and aggregation Homo sapiens R-HSA-76002      | 7/253   | 0.03410112062815847  | 1.0 | 2.2960982730060846 | DAGLA;IL2RA;PRKCA;GAS6;THBS1;PIK3R6;DGKI                                                                                                                                                                                                 | 7.757195881999426  |
| Phase 2 - plateau phase Homo sapiens R-HSA-5576893                           | 2/26    | 0.03887186562813442  | 1.0 | 6.383657835939994  | CACNG8;KCNE3                                                                                                                                                                                                                             | 20.730830122325457 |
| CREB phosphorylation through the activation of Ras Homo sapiens R-HSA-442742 | 2/27    | 0.041655055949402366 | 1.0 | 6.147226064238512  | GRIN2A;RPS6KA2                                                                                                                                                                                                                           | 19.537928547068844 |
| Effects of PIP2 hydrolysis Homo sapiens R-HSA-114508                         | 2/27    | 0.041655055949402366 | 1.0 | 6.147226064238512  | DAGLA;DGKI                                                                                                                                                                                                                               | 19.537928547068844 |
| Transmission across Chemical Synapses Homo sapiens R-HSA-112315              | 6/211   | 0.0429901240771239   | 1.0 | 2.3598355981199974 | CHRNA1;GRIN2A;CACNG8;RPS6KA2;SLC1A3;PRKCA                                                                                                                                                                                                | 7.425894937662731  |
| O-linked glycosylation Homo sapiens R-HSA-5173105                            | 4/110   | 0.044162317711530785 | 1.0 | 3.0177291588079966 | ADAMTSL1;ADAMTS9;THBS1;MUC4                                                                                                                                                                                                              | 9.414963090096993  |
| Signal Transduction Homo sapiens R-HSA-162582                                | 39/2465 | 0.04527087512489801  | 1.0 | 1.312987636033094  | CALCRL;DAGLA;LPL;RASAL1;PTPRK;KALRN;CHRDL1;THBS1;PIK3R6;GHR;SYDE1;CDH5;GRIN2A;RPS6KA2;MYC;MCF2L;GRM8;CCL2;CCR6;CCL17;GPC6;DRD5;WWTR1;NTRK2;STARD13;OPN4;PTGIR;GAB1;ARHGAP29;PRKCA;INHBB;WNT9A;ARHGAP31;IL2RA;RHOJ;PDE3A;COL6A3;MYL9;DGKI | 4.063816722852     |

## KEGG 2019 Human, only P<0.05 included

| Term                                                | Overlap    | p-value                  | Adjusted P-value       | Odds Ratio             | Genes                                                           | Combined Score         |
|-----------------------------------------------------|------------|--------------------------|------------------------|------------------------|-----------------------------------------------------------------|------------------------|
| Cytokine-cytokine receptor interaction              | 10/29<br>4 | 0.00311523279551<br>2783 | 0.959491701017<br>9372 | 2.822705845823<br>807  | ACVRL1;GHR;IL2RA;IL21R;CD27;CCL2;INHBB;TNFRSF11A<br>;CCR6;CCL17 | 16.29110959387<br>805  |
| Amphetamine addiction                               | 4/68       | 0.00917033734519<br>437  | 1.0                    | 4.881620698071<br>759  | ARC;GRIN2A;CREB3L1;PRKCA                                        | 22.90349624346<br>5533 |
| Aldosterone-regulated sodium reabsorption           | 3/37       | 0.00992841072255<br>7174 | 1.0                    | 6.728720421666<br>48   | SCNN1A;ATP1A3;PRKCA                                             | 31.03524635066<br>7034 |
| Nitrogen metabolism                                 | 2/17       | 0.01745703716897<br>542  | 1.0                    | 9.763241396143<br>519  | CA7;CA6                                                         | 39.52172258207<br>1035 |
| Insulin secretion                                   | 4/86       | 0.02024243630107<br>5837 | 1.0                    | 3.859886133359<br>066  | PCLO;CREB3L1;ATP1A3;PRKCA                                       | 15.05345583788<br>6013 |
| Vascular smooth muscle contraction                  | 5/132      | 0.02195352973475<br>6186 | 1.0                    | 3.143467873758<br>3304 | PTGIR;CALCRL;CALD1;PRKCA;MYL9                                   | 12.00436107263<br>8043 |
| PI3K-Akt signaling pathway                          | 9/354      | 0.02826585158768<br>6543 | 1.0                    | 2.109853013573<br>388  | GHR;NTRK2;CREB3L1;MYC;IL2RA;COL6A3;PRKCA;THBS1<br>;PIK3R6       | 7.523948647463<br>423  |
| Aldosterone synthesis and secretion                 | 4/98       | 0.03083656150476<br>786  | 1.0                    | 3.387247014988<br>5676 | DAGLA;CREB3L1;ATP1A3;PRKCA                                      | 11.78441605948<br>1181 |
| Adrenergic signaling in cardiomyocytes              | 5/145      | 0.03124736810700<br>751  | 1.0                    | 2.861639719559<br>3075 | CACNG8;CREB3L1;ATP1A3;PRKCA;PIK3R6                              | 9.917928536048<br>757  |
| Phospholipase D signaling pathway                   | 5/148      | 0.03369377508966<br>388  | 1.0                    | 2.803633509027<br>7    | GRM8;GAB1;PRKCA;DGKI;PIK3R6                                     | 9.505557289800<br>55   |
| Glycerolipid metabolism                             | 3/61       | 0.03729988253640<br>3    | 1.0                    | 4.081355009863<br>275  | LPL;DGKI;LPIN3                                                  | 13.42261792325<br>1844 |
| Maturity onset diabetes of the young                | 2/26       | 0.03887186562813<br>442  | 0.997711217788<br>7834 | 6.383657835939<br>994  | NR5A2;BHLHA15                                                   | 20.73083012232<br>5457 |
| Parathyroid hormone synthesis, secretion and action | 4/106      | 0.03941336600420<br>486  | 0.933793594561<br>1613 | 3.131605730838<br>4875 | MMP14;MAFB;CREB3L1;PRKCA                                        | 10.12651775313<br>9526 |
| cAMP signaling pathway                              | 6/212      | 0.04381665900641<br>768  | 0.963966498141<br>189  | 2.348704298128<br>8657 | GRIN2A;CREB3L1;PDE3A;ATP1A3;MYL9;DRD5                           | 7.346139179439<br>546  |
| Long-term potentiation                              | 3/67       | 0.04714047402966<br>499  | 0.967951066742<br>4545 | 3.715860531368<br>056  | GRIN2A;RPS6KA2;PRKCA                                            | 11.35055425431<br>5568 |
| Glutamatergic synapse                               | 4/114      | 0.04921836679100<br>779  | 0.947453560726<br>8999 | 2.911843925165<br>611  | GRIN2A;GRM8;SLC1A3;PRKCA                                        | 8.768984250959<br>983  |

**Panther 2016, only P<0.05 included**

| Term                                                                            | Overlap | P-value            | Adjusted P-value | Odds Ratio       | Genes                   | Combined Score   |
|---------------------------------------------------------------------------------|---------|--------------------|------------------|------------------|-------------------------|------------------|
| Metabotropic glutamate receptor group III pathway Homo sapiens P00039           | 3/54    | 0.0273164906652690 | 1.0              | 4.61041954817888 | GRIN2A;GRM8;SLC1A3      | 16.5987307767881 |
| PDGF signaling pathway Homo sapiens P00047                                      | 4/112   | 0.0466520129633925 | 1.0              | 2.96384113811499 | MYC;RPS6KA2;PRKCA;RERG  | 9.08428927764984 |
| Huntington disease Homo sapiens P00029                                          | 4/124   | 0.0631908397559889 | 1.0              | 2.67701780216838 | GRIN2A;DNAH7;RHOJ;KALRN | 7.39284146407179 |
| 2-arachidonoylglycerol biosynthesis Homo sapiens P05726                         | 1/6     | 0.0701648752848036 | 1.0              | 13.8312586445366 | DAGLA                   | 36.7483740696620 |
| Interleukin signaling pathway Homo sapiens P00036                               | 3/86    | 0.0855798662416434 | 1.0              | 2.89491460001929 | MYC;RPS6KA2;IL2RA       | 7.11658370440265 |
| Muscarinic acetylcholine receptor 1 and 3 signaling pathway Homo sapiens P00042 | 2/42    | 0.0909739270651063 | 1.0              | 3.95178818415332 | GRIN2A;PRKCA            | 9.47315680413686 |

## Supplementary Table 7

### Kasumi-2

| Drug combination         | Synergy score | Most synergistic area | Method |
|--------------------------|---------------|-----------------------|--------|
| Navitoclax - dasatinib   | 2.017         | 7.17                  | ZIP    |
| Venetoclax - idasanutlin | 13.094        | 30.54                 | ZIP    |
| Venetoclax - dasatinib   | -0.389        | 5.63                  | ZP     |
| Idasanutlin - dasatinib  | 2.013         | 8.61                  | ZIP    |
| Navitoclax - idasanutlin | 8.259         | 22.91                 | ZIP    |

### NALM-21

| Drug combination         | Synergy score | Most synergistic area | Method |
|--------------------------|---------------|-----------------------|--------|
| Navitoclax - dasatinib   | 18.118        | 24.26                 | ZIP    |
| Venetoclax - idasanutlin | 7.362         | 17.63                 | ZIP    |
| Venetoclax - dasatinib   | 13.536        | 21.71                 | ZP     |
| Idasanutlin - dasatinib  | 17.786        | 23.52                 | ZIP    |
| Navitoclax - idasanutlin | 4.995         | 16.41                 | ZIP    |

### MHH-CALL-4

| Drug combination         | Synergy score | Most synergistic area | Method |
|--------------------------|---------------|-----------------------|--------|
| Navitoclax - dasatinib   | -0.6          | 2.72                  | ZIP    |
| Venetoclax - idasanutlin | 7.172         | 15.26                 | ZIP    |
| Venetoclax - dasatinib   | -0.294        | 3.52                  | ZP     |
| Idasanutlin - dasatinib  | -2.415        | 2.92                  | ZIP    |
| Navitoclax - idasanutlin | 4.303         | 12.89                 | ZIP    |

### Single compound drug sensitivity scores

| Drug        | Kasumi-2 | NALM-21 | MHH-CALL-4 |
|-------------|----------|---------|------------|
| Dasatinib   | 4.7      | 23.8    | 0.9        |
| Idasanutlin | 4        | 10.8    | 9.1        |
| Navitoclax  | 13.7     | 11.4    | 17.6       |
| Venetoclax  | 22.7     | 21.8    | 18         |

**Supplementary Table 8**  
**Cybersort results**

| Input Sample | B cells naive | B cells memory | Plasma cells | T cells CD8 | T cells CD4 naive | T cells CD4 memory resting | T cells CD4 memory activated | T cells follicular helper | T cells regulatory (Tregs) | T cells gamma delta |
|--------------|---------------|----------------|--------------|-------------|-------------------|----------------------------|------------------------------|---------------------------|----------------------------|---------------------|
| Pt_1         | 0,48940621    | 0              | 0,11752584   | 0,05757826  | 0,02398139        | 0,11769721                 | 0,01095103                   | 0                         | 0                          | 0                   |
| Pt_3         | 0,42752042    | 0              | 0,111297     | 0,01368172  | 0,08008593        | 0,16934629                 | 0,01411626                   | 0                         | 0                          | 0                   |
| Pt_4         | 0,62212572    | 0              | 0,02990109   | 0           | 0,08845354        | 0,13948822                 | 0,01053765                   | 0                         | 0                          | 0                   |
| Pt_5         | 0,43014894    | 0              | 0,07445067   | 0,00272206  | 0,07233965        | 0,15225626                 | 0,00248034                   | 0                         | 0                          | 0                   |
| Pt_7         | 0,57143616    | 0              | 0,04977108   | 0,05850536  | 0,021681          | 0,13348515                 | 0,00475866                   | 0                         | 0                          | 0                   |
| Pt_8         | 0,28104703    | 0              | 0,16797193   | 0,01343299  | 0,00471881        | 0,16113759                 | 0,01577013                   | 0                         | 0                          | 0                   |
| Pt_9         | 0,27440284    | 0              | 0,1197426    | 0,04698032  | 0,0413483         | 0,22820692                 | 0,03025476                   | 0                         | 0                          | 0                   |
| Pt_10        | 0,08718133    | 0              | 0,15938684   | 0,00185698  | 0,14409175        | 0,21492366                 | 0                            | 0                         | 0                          | 0                   |
| Pt_11        | 0,27644711    | 0              | 0,021639     | 0,01446325  | 0,02871856        | 0,22815901                 | 0                            | 0                         | 0                          | 0                   |
| Pt_12        | 0,44791642    | 0              | 0,16366861   | 0,01388177  | 0,07989307        | 0,09559835                 | 0                            | 0                         | 0                          | 0                   |
| Pt_13        | 0,50747881    | 0              | 0,16340155   | 0,01434802  | 0,02511304        | 0,08789635                 | 0,00576268                   | 0                         | 0                          | 0                   |
| Pt_14        | 0,40818746    | 0              | 0,05925323   | 0,0460171   | 0,0048934         | 0,26820023                 | 0,0006                       | 0                         | 0                          | 0                   |
| Pt_15        | 0,26968486    | 0              | 0,13326949   | 0           | 0,04170505        | 0,17816441                 | 0,0129203                    | 0                         | 0                          | 0,00248284          |
| Pt_16        | 0,30704634    | 0              | 0,06802666   | 0           | 0,04279187        | 0,10003106                 | 0,005647                     | 0                         | 0                          | 0                   |
| Pt_17        | 0,25612716    | 0              | 0,04990274   | 0,12870866  | 0,01805766        | 0,27536369                 | 0,02545662                   | 0                         | 0                          | 0                   |
| Pt_18        | 0,30696733    | 0              | 0,07527251   | 0           | 0,04673226        | 0,22643246                 | 0                            | 0                         | 0                          | 0                   |

| Input Sample | NK cells<br>resting | NK cells<br>activated | Monocytes  | Macrophages<br>M0 | Macrophages<br>M1 | Macrophages<br>M2 | Dendritic<br>cells resting | Dendritic<br>cells<br>activated | Mast cells<br>resting | Mast cells<br>activated |
|--------------|---------------------|-----------------------|------------|-------------------|-------------------|-------------------|----------------------------|---------------------------------|-----------------------|-------------------------|
| Pt_1         | 0,08972951          | 0                     | 0,03788398 | 0                 | 0                 | 0,01995297        | 0                          | 0,00345396                      | 0,00104523            | 0                       |
| Pt_3         | 0,05339082          | 0,00331935            | 0,0192846  | 0,00630801        | 0                 | 0,02547949        | 0                          | 0,00682087                      | 0,0458004             | 0                       |
| Pt_4         | 0,01939523          | 0                     | 0,02798657 | 0                 | 0                 | 0,00495727        | 0                          | 0,00646234                      | 0,0003                | 0                       |
| Pt_5         | 0,06946206          | 0                     | 0,11091774 | 0,02339767        | 0                 | 0                 | 0                          | 0,00496152                      | 0,00319604            | 0                       |
| Pt_7         | 0,0310833           | 0,01820622            | 0,05806295 | 0,00691297        | 0                 | 0,00942291        | 0                          | 0                               | 0,02153875            | 0                       |
| Pt_8         | 0,06020868          | 0                     | 0,1714927  | 0,01882838        | 0                 | 0                 | 0                          | 0,00191971                      | 0,0218815             | 0                       |
| Pt_9         | 0,11469959          | 0                     | 0,07529039 | 0,00280195        | 0                 | 0,00507316        | 0                          | 0,00321723                      | 0                     | 0                       |
| Pt_10        | 0,09132017          | 0                     | 0,20174869 | 0,04093953        | 0                 | 0                 | 0                          | 0,00728156                      | 0                     | 0,01279035              |
| Pt_11        | 0,02352858          | 0,03146945            | 0,23862987 | 0,07001044        | 0                 | 0                 | 0                          | 0,0089916                       | 0,02145011            | 0                       |
| Pt_12        | 0,05674543          | 0                     | 0,07545976 | 0,00926098        | 0                 | 0                 | 0                          | 0,00394888                      | 0,00205219            | 0                       |
| Pt_13        | 0,07560423          | 0                     | 0,05960106 | 0                 | 0                 | 0,02827605        | 0                          | 0,00412451                      | 0                     | 0                       |
| Pt_14        | 0,08573911          | 0                     | 0,07187934 | 0,01489054        | 0                 | 0,0004            | 0                          | 0,00280459                      | 0                     | 0                       |
| Pt_15        | 0,04358987          | 0                     | 0,23977542 | 0,02826303        | 0                 | 0                 | 0                          | 0,00653271                      | 0,02016911            | 0                       |
| Pt_16        | 0,06437322          | 0                     | 0,23098338 | 0,03748237        | 0                 | 0                 | 0                          | 0,00186095                      | 0,01368523            | 0                       |
| Pt_17        | 0,10952485          | 0                     | 0,0528709  | 0,0035614         | 0                 | 0                 | 0                          | 0,00519901                      | 0,01508254            | 0                       |
| Pt_18        | 0,09786735          | 0                     | 0,12676245 | 0,03306316        | 0                 | 0                 | 0                          | 0,00278954                      | 0                     | 0                       |

| Input  |             |             |         | Pearson     |            |
|--------|-------------|-------------|---------|-------------|------------|
| Sample | Eosinophils | Neutrophils | P-value | Correlation | RMSE       |
| Pt_1   | 0,03079442  | 0           | 0,04    | 0,18387534  | 1,03629911 |
| Pt_3   | 0,02354885  | 0           | 0,02    | 0,21664567  | 1,01057504 |
| Pt_4   | 0,05042941  | 0           | 0       | 0,47271536  | 0,88965418 |
| Pt_5   | 0,04605083  | 0,00761623  | 0       | 0,28843343  | 0,97615803 |
| Pt_7   | 0,0151355   | 0           | 0       | 0,31034979  | 0,98271536 |
| Pt_8   | 0,07784525  | 0,0037453   | 0       | 0,25434415  | 0,97804991 |
| Pt_9   | 0,05337769  | 0,00460424  | 0,04    | 0,17841716  | 1,0193098  |
| Pt_10  | 0,03847915  | 0           | 0,02    | 0,20348728  | 0,99922343 |
| Pt_11  | 0,03649302  | 0           | 0,02    | 0,20113291  | 1,00835584 |
| Pt_12  | 0,05157455  | 0           | 0,02    | 0,20372252  | 1,01709099 |
| Pt_13  | 0,02839371  | 0           | 0,06    | 0,16754489  | 1,04243164 |
| Pt_14  | 0,03721237  | 0           | 0       | 0,35421172  | 0,94579409 |
| Pt_15  | 0,02344291  | 0           | 0,06    | 0,16704462  | 1,01638294 |
| Pt_16  | 0,04786867  | 0,08020325  | 0,08    | 0,14717542  | 1,03524593 |
| Pt_17  | 0,06014477  | 0           | 0       | 0,23577572  | 1,00341775 |
| Pt_18  | 0,08411293  | 0           | 0,24    | 0,0832868   | 1,05815279 |

## Cibersort comparison, DSRT vs Hemap cohorts

| Cell_type                              | p value      | p. adjusted  | Median_DSRT_cohort | IQR_DSRT_cohort | Median_Hemap_cohort | IQR_Hemap_cohort |
|----------------------------------------|--------------|--------------|--------------------|-----------------|---------------------|------------------|
| CIBERSORT_B_cells_naive                | 3.448683e-02 | 4.741939e-02 | 0.357616900        | 0.1823528274    | 0.297376793         | 0.20911625       |
| CIBERSORT_B_cells_memory               | 1.144429e-05 | 4.015428e-05 | 0.000000000        | 0.000000000     | 0.046916479         | 0.18267441       |
| CIBERSORT_Plasma_cells                 | 4.016605e-01 | 4.650806e-01 | 0.093284754        | 0.0828832144    | 0.112156866         | 0.16747598       |
| CIBERSORT_T_cells_CD8                  | 4.110224e-06 | 1.808499e-05 | 0.013781748        | 0.0448651735    | 0.071285580         | 0.06326444       |
| CIBERSORT_T_cells_CD4_naive            | 1.071453e-04 | 2.946494e-04 | 0.041526673        | 0.0508217136    | 0.000000000         | 0.03930808       |
| CIBERSORT_T_cells_CD4_memory_resting   | 9.868604e-08 | 1.085546e-06 | 0.165241939        | 0.0973259349    | 0.043213376         | 0.09919984       |
| CIBERSORT_T_cells_CD4_memory_activated | 6.695438e-08 | 1.085546e-06 | 0.005704841        | 0.0127692934    | 0.000000000         | 0.00000000       |
| CIBERSORT_T_cells_follicular_helper    | 3.153903e-06 | 1.734647e-05 | 0.000000000        | 0.000000000     | 0.012308108         | 0.03610491       |
| CIBERSORT_T_cells_regulatory_Tregs     | 3.354227e-02 | 4.741939e-02 | 0.000000000        | 0.000000000     | 0.000000000         | 0.00000000       |
| CIBERSORT_T_cells_gamma_delta          | 7.168613e-01 | 7.168613e-01 | 0.000000000        | 0.000000000     | 0.000000000         | 0.00000000       |
| CIBERSORT_NK_cells_resting             | 1.277636e-05 | 4.015428e-05 | 0.066917638        | 0.0391865904    | 0.019905322         | 0.05210144       |
| CIBERSORT_NK_cells_activated           | 3.962508e-04 | 8.829061e-04 | 0.000000000        | 0.000000000     | 0.014404072         | 0.04993236       |
| CIBERSORT_Monocytes                    | 1.479929e-03 | 2.959859e-03 | 0.075375076        | 0.1222917588    | 0.039589995         | 0.05605885       |
| CIBERSORT_Macrophages_M0               | 2.714431e-02 | 4.593653e-02 | 0.012075757        | 0.0260915205    | 0.000000000         | 0.01866645       |
| CIBERSORT_Macrophages_M1               | 2.652702e-01 | 3.242191e-01 | 0.000000000        | 0.000000000     | 0.000000000         | 0.00000000       |
| CIBERSORT_Macrophages_M2               | 4.013210e-04 | 8.829061e-04 | 0.000000000        | 0.0061605983    | 0.016323807         | 0.02848970       |
| CIBERSORT_Dendritic_cells_resting      | 4.827911e-01 | 5.057812e-01 | 0.000000000        | 0.000000000     | 0.000000000         | 0.00000000       |
| CIBERSORT_Dendritic_cells_activated    | 4.432138e-01 | 4.875352e-01 | 0.004036697        | 0.0036791092    | 0.005403422         | 0.01243414       |
| CIBERSORT_Mast_cells_resting           | 3.359959e-02 | 4.741939e-02 | 0.002624115        | 0.0204893579    | 0.000000000         | 0.01204979       |
| CIBERSORT_Mast_cells_activated         | 3.934120e-07 | 2.885021e-06 | 0.000000000        | 0.000000000     | 0.024111167         | 0.05327747       |
| CIBERSORT_Eosinophils                  | 1.929110e-03 | 3.536701e-03 | 0.042264990        | 0.0205214492    | 0.017790855         | 0.03677692       |
| CIBERSORT_Neutrophils                  | 4.285680e-02 | 5.546175e-02 | 0.000000000        | 0.0009363248    | 0.000492018         | 0.01143310       |
